# Supplementary material for: Correlation of temperature dependence of hydride kinetic isotope effects with donor–acceptor distances in two solvents of different polarities
Source: Royal Society of Chemistry journal article supplement (doi:10.1039/d3ob00718a), 2023-01-01
Supplement: d3ob00718a1.pdf [file d3ob00718a1.pdf]

## Supporting Information

### Correlation of Temperature Dependence of Hydride Kinetic Isotope Effects with Donor-Acceptor Distances in Two Solvents of Different Polarities

Mingxuan Bai, Pratap Rijal, Sanaz Salarvand, Yun Lu\*

Department of Chemistry, Southern Illinois University Edwardsville, Edwardsville, Illinois 62026, United States

|                                                                                                                   |     |
|-------------------------------------------------------------------------------------------------------------------|-----|
| The atom coordinates and electronic energies of the reactant and product geometries of gas-phase TRSs .....       | S2  |
| The atom coordinates and electronic energies for the reactant and product geometries of solution-phase TRSs ..... | S14 |
| The atom coordinates and electronic energies of the gas-phase ground state (GS) reactant geometries ... ..        | S30 |
| The atom coordinates and electronic energies for the solution-phase ground state (GS) reactant geometries .....   | S31 |
| The atom coordinates and electronic energies for the gas-phase classical TSs .....                                | S33 |

**The atom coordinates and electronic energies of the gas-phase TRS's**

DAD = 2.8Å

TRS2: product state, electronic energy = -1284.50945516 Hartree

|   |                 |                 |                 |
|---|-----------------|-----------------|-----------------|
| C | 4.617787000000  | -0.575966000000 | -0.807668000000 |
| C | 4.884173000000  | -0.169950000000 | 0.516168000000  |
| C | 3.380943000000  | -0.370061000000 | -1.401295000000 |
| H | 5.405069000000  | -1.069718000000 | -1.377615000000 |
| C | 3.924174000000  | 0.465699000000  | 1.291268000000  |
| H | 5.871126000000  | -0.358579000000 | 0.939283000000  |
| C | 2.413194000000  | 0.279241000000  | -0.627374000000 |
| H | 3.180868000000  | -0.697064000000 | -2.421132000000 |
| C | 2.687181000000  | 0.694344000000  | 0.683601000000  |
| H | 4.130248000000  | 0.778254000000  | 2.314876000000  |
| N | 1.113532000000  | 0.664408000000  | -0.889726000000 |
| N | 1.543784000000  | 1.316395000000  | 1.142974000000  |
| C | 0.537253000000  | 1.188448000000  | 0.236740000000  |
| C | 0.453235000000  | 0.543239000000  | -2.178380000000 |
| C | 1.412222000000  | 1.954360000000  | 2.441645000000  |
| H | -0.713693000000 | 0.079193000000  | 0.846360000000  |
| C | -0.333913000000 | 2.368997000000  | -0.126424000000 |
| H | -0.601549000000 | 0.291232000000  | -2.019910000000 |
| H | 0.532158000000  | 1.487796000000  | -2.734864000000 |
| H | 0.933938000000  | -0.267951000000 | -2.737125000000 |
| H | 2.199263000000  | 2.711276000000  | 2.558047000000  |
| H | 0.432602000000  | 2.443188000000  | 2.497651000000  |
| H | 1.502885000000  | 1.209973000000  | 3.245078000000  |
| C | -1.724219000000 | 2.284921000000  | -0.220868000000 |
| C | 0.329045000000  | 3.565096000000  | -0.429096000000 |
| C | -2.453811000000 | 3.398746000000  | -0.640344000000 |
| H | -2.243498000000 | 1.355786000000  | 0.027863000000  |
| C | -0.407800000000 | 4.671190000000  | -0.841562000000 |
| H | 1.417570000000  | 3.623626000000  | -0.351538000000 |
| C | -1.797965000000 | 4.588146000000  | -0.949120000000 |
| H | -3.539422000000 | 3.333835000000  | -0.717775000000 |
| H | 0.105465000000  | 5.603413000000  | -1.080273000000 |
| H | -2.370197000000 | 5.458286000000  | -1.272817000000 |
| H | 1.486631000000  | -1.767092000000 | 2.465585000000  |
| C | 1.263104000000  | -2.115068000000 | 1.454111000000  |
| C | 0.046533000000  | -1.760153000000 | 0.876918000000  |
| C | 2.189801000000  | -2.888049000000 | 0.757859000000  |
| C | -0.288912000000 | -2.218476000000 | -0.415739000000 |
| C | -0.918309000000 | -0.830335000000 | 1.519631000000  |
| C | 1.866881000000  | -3.332394000000 | -0.522412000000 |
| H | 3.144030000000  | -3.152477000000 | 1.213815000000  |
| C | 0.638816000000  | -3.017108000000 | -1.103645000000 |
| N | -1.518211000000 | -1.838288000000 | -0.977642000000 |
| C | -2.350689000000 | -1.021039000000 | 1.151336000000  |
| H | 2.568284000000  | -3.958153000000 | -1.076425000000 |
| H | 0.400338000000  | -3.427566000000 | -2.083083000000 |
| C | -2.608621000000 | -1.530725000000 | -0.136744000000 |
| C | -1.799469000000 | -2.211562000000 | -2.350271000000 |
| C | -3.407168000000 | -0.674822000000 | 1.991045000000  |
| C | -3.939078000000 | -1.687973000000 | -0.548069000000 |
| H | -2.579173000000 | -1.554420000000 | -2.752782000000 |
| H | -0.899961000000 | -2.073403000000 | -2.961286000000 |
| H | -2.132163000000 | -3.259329000000 | -2.447975000000 |
| C | -4.728242000000 | -0.805316000000 | 1.566584000000  |
| H | -3.185823000000 | -0.295977000000 | 2.990867000000  |
| C | -4.984306000000 | -1.316782000000 | 0.297153000000  |
| H | -4.175798000000 | -2.115442000000 | -1.520334000000 |
| H | -5.548696000000 | -0.525428000000 | 2.227074000000  |
| H | -6.012133000000 | -1.446774000000 | -0.043543000000 |
| H | -0.693151000000 | -0.263966000000 | 2.432451000000  |

TRS2: reactant state, electronic energy = -1284.50946729 Hartree

|   |                 |                 |                 |
|---|-----------------|-----------------|-----------------|
| C | 4.324221000000  | -1.342191000000 | -1.112924000000 |
| C | 4.800045000000  | -0.894225000000 | 0.115873000000  |
| C | 3.011630000000  | -1.060336000000 | -1.527632000000 |
| H | 4.981147000000  | -1.909841000000 | -1.772142000000 |
| C | 3.989330000000  | -0.139264000000 | 0.981307000000  |
| H | 5.826446000000  | -1.115707000000 | 0.409344000000  |
| C | 2.210304000000  | -0.320094000000 | -0.671660000000 |
| H | 2.645428000000  | -1.401110000000 | -2.496662000000 |
| C | 2.696801000000  | 0.142960000000  | 0.568647000000  |
| H | 4.375658000000  | 0.226823000000  | 1.932785000000  |
| N | 0.886831000000  | 0.089312000000  | -0.782359000000 |
| N | 1.667833000000  | 0.828479000000  | 1.194359000000  |
| C | 0.560003000000  | 0.992914000000  | 0.289858000000  |
| C | 0.176536000000  | 0.141362000000  | -2.035746000000 |
| C | 1.854992000000  | 1.703471000000  | 2.325411000000  |
| H | -0.398594000000 | 0.652038000000  | 0.791433000000  |
| C | 0.284334940000  | 2.426479300000  | -0.137461280000 |
| H | -0.894997000000 | 0.296269000000  | -1.841659000000 |
| H | 0.530996000000  | 0.959069000000  | -2.686308000000 |
| H | 0.303201000000  | -0.815292000000 | -2.562603000000 |
| H | 2.390547000000  | 2.629841000000  | 2.056194000000  |
| H | 0.874844000000  | 1.983968000000  | 2.735016000000  |
| H | 2.420559000000  | 1.180397000000  | 3.109116000000  |
| C | -0.980453950000 | 2.989113780000  | 0.026260830000  |
| C | 1.313848340000  | 3.177420470000  | -0.717247540000 |
| C | -1.222025430000 | 4.301464280000  | -0.385493340000 |
| H | -1.783864170000 | 2.398211750000  | 0.475547250000  |
| C | 1.072699910000  | 4.485499940000  | -1.126537780000 |
| H | 2.305376580000  | 2.732326750000  | -0.844106400000 |
| C | -0.196239980000 | 5.047684320000  | -0.960359690000 |
| H | -2.211793600000 | 4.740737990000  | -0.255831570000 |
| H | 1.874669180000  | 5.072469950000  | -1.575936270000 |
| H | -0.382467860000 | 6.073473070000  | -1.280836400000 |
| H | 0.948024000000  | -1.489109000000 | 2.702380000000  |
| C | 0.728277000000  | -1.992941000000 | 1.760311000000  |
| C | -0.489414000000 | -1.674779000000 | 1.098084000000  |
| C | 1.608829000000  | -2.888980000000 | 1.215572000000  |
| C | -0.823515000000 | -2.320826000000 | -0.135781000000 |
| C | -1.318522000000 | -0.647313000000 | 1.562961000000  |
| C | 1.277739000000  | -3.515318000000 | -0.008623000000 |
| H | 2.552806000000  | -3.119208000000 | 1.708658000000  |
| C | 0.090210000000  | -3.265150000000 | -0.663624000000 |
| N | -2.005779000000 | -2.011797000000 | -0.761775000000 |
| C | -2.615947000000 | -0.478786000000 | 1.013334000000  |
| H | 1.971723000000  | -4.238194000000 | -0.440472000000 |
| H | -0.131614000000 | -3.821730000000 | -1.570008000000 |
| C | -2.952284000000 | -1.190779000000 | -0.169317000000 |
| C | -2.303307000000 | -2.584613000000 | -2.074525000000 |
| C | -3.568536000000 | 0.386780000000  | 1.606688000000  |
| C | -4.253752000000 | -1.045333000000 | -0.702601000000 |
| H | -2.888887000000 | -1.867269000000 | -2.656607000000 |
| H | -1.373200000000 | -2.762010000000 | -2.618704000000 |
| H | -2.860606000000 | -3.528188000000 | -1.981823000000 |
| C | -4.823381000000 | 0.529961000000  | 1.064109000000  |
| H | -3.285902000000 | 0.927371000000  | 2.512205000000  |
| C | -5.161100000000 | -0.201356000000 | -0.093395000000 |
| H | -4.569527000000 | -1.612058000000 | -1.574872000000 |
| H | -5.557353000000 | 1.188019000000  | 1.528585000000  |
| H | -6.163049000000 | -0.111441000000 | -0.514753000000 |
| H | -1.091156280000 | -0.188503470000 | 2.529398950000  |

TRS8: product state, electronic energy = -1284.51962522 Hartree

|   |                 |                 |                 |
|---|-----------------|-----------------|-----------------|
| C | -1.870408000000 | -1.578971000000 | 3.343442000000  |
| C | -1.932236000000 | -0.206169000000 | 3.665557000000  |
| C | -1.032194000000 | -2.059206000000 | 2.345883000000  |
| H | -2.497077000000 | -2.279735000000 | 3.895909000000  |
| C | -1.159034000000 | 0.735469000000  | 2.999789000000  |
| H | -2.604644000000 | 0.120675000000  | 4.459248000000  |
| C | -0.234308000000 | -1.114862000000 | 1.691529000000  |
| H | -0.986243000000 | -3.119178000000 | 2.095794000000  |
| C | -0.299308000000 | 0.249587000000  | 2.009748000000  |
| H | -1.209858000000 | 1.796806000000  | 3.243447000000  |
| N | 0.736645000000  | -1.247401000000 | 0.725355000000  |
| N | 0.635081000000  | 0.883634000000  | 1.221805000000  |
| C | 1.198000000000  | -0.006468000000 | 0.350751000000  |
| C | 1.107521000000  | -2.518657000000 | 0.122923000000  |
| C | 0.956047000000  | 2.299307000000  | 1.311727000000  |
| H | 0.658543000000  | 0.293890000000  | -1.196721000000 |
| C | 2.695883000000  | 0.003639000000  | 0.145463000000  |
| H | 1.825211000000  | -2.337452000000 | -0.683857000000 |
| H | 1.569493000000  | -3.166506000000 | 0.881337000000  |
| H | 0.211837000000  | -3.002760000000 | -0.293560000000 |
| H | 1.810588000000  | 2.510999000000  | 0.659488000000  |
| H | 0.094147000000  | 2.903495000000  | 0.992312000000  |
| H | 1.224279000000  | 2.540988000000  | 2.349024000000  |
| C | 3.309959000000  | 0.676297000000  | -0.913286000000 |
| C | 3.479595000000  | -0.634906000000 | 1.115590000000  |
| C | 4.701065000000  | 0.697867000000  | -1.016562000000 |
| H | 2.702903000000  | 1.191660000000  | -1.659294000000 |
| C | 4.866602000000  | -0.611429000000 | 1.007009000000  |
| H | 3.003401000000  | -1.142053000000 | 1.957307000000  |
| C | 5.478583000000  | 0.050177000000  | -0.059487000000 |
| H | 5.175758000000  | 1.221473000000  | -1.846796000000 |
| H | 5.474360000000  | -1.110403000000 | 1.762674000000  |
| H | 6.566093000000  | 0.062897000000  | -0.140008000000 |
| H | 0.470114000000  | 3.114326000000  | -2.560297000000 |
| C | -0.366531000000 | 2.958315000000  | -1.875371000000 |
| C | -0.766717000000 | 1.650705000000  | -1.596139000000 |
| C | -1.013730000000 | 4.048870000000  | -1.302865000000 |
| C | -1.866306000000 | 1.406699000000  | -0.743302000000 |
| C | -0.024064000000 | 0.482145000000  | -2.120650000000 |
| C | -2.100306000000 | 3.814302000000  | -0.461032000000 |
| H | -0.692004000000 | 5.065661000000  | -1.527066000000 |
| C | -2.531739000000 | 2.516877000000  | -0.191958000000 |
| N | -2.253838000000 | 0.089925000000  | -0.453431000000 |
| C | -0.736851000000 | -0.817733000000 | -2.130598000000 |
| H | -2.643534000000 | 4.652252000000  | -0.022068000000 |
| H | -3.414719000000 | 2.386198000000  | 0.428571000000  |
| C | -1.834978000000 | -0.979839000000 | -1.258775000000 |
| C | -3.375596000000 | -0.125210000000 | 0.442409000000  |
| C | -0.314238000000 | -1.876768000000 | -2.935158000000 |
| C | -2.468543000000 | -2.234771000000 | -1.215855000000 |
| H | -3.283736000000 | -1.106569000000 | 0.918701000000  |
| H | -3.354802000000 | 0.614464000000  | 1.247320000000  |
| H | -4.344805000000 | -0.064930000000 | -0.081523000000 |
| C | -0.932699000000 | -3.121428000000 | -2.871662000000 |
| H | 0.520168000000  | -1.712834000000 | -3.620840000000 |
| C | -2.011420000000 | -3.289435000000 | -2.004039000000 |
| H | -3.343629000000 | -2.397059000000 | -0.591393000000 |
| H | -0.592828000000 | -3.942302000000 | -3.502804000000 |
| H | -2.528749000000 | -4.248513000000 | -1.953433000000 |
| H | 0.832244000000  | 0.584975000000  | -2.798077000000 |

TRSS: reactant state, electronic energy = -1284.51962370 Hartree

|   |                 |                 |                 |
|---|-----------------|-----------------|-----------------|
| C | 1.442140000000  | 0.339640000000  | 3.723053000000  |
| C | 1.407255000000  | -1.050377000000 | 3.609342000000  |
| C | 0.785779000000  | 1.161195000000  | 2.792170000000  |
| H | 1.968318000000  | 0.798141000000  | 4.560839000000  |
| C | 0.716442000000  | -1.676395000000 | 2.558832000000  |
| H | 1.906202000000  | -1.664506000000 | 4.359627000000  |
| C | 0.105087000000  | 0.542663000000  | 1.751449000000  |
| H | 0.790487000000  | 2.246774000000  | 2.897599000000  |
| C | 0.072441000000  | -0.863848000000 | 1.634621000000  |
| H | 0.669404000000  | -2.763400000000 | 2.484841000000  |
| N | -0.625432000000 | 1.074278000000  | 0.705647000000  |
| N | -0.674379000000 | -1.180445000000 | 0.516710000000  |
| C | -1.252874000000 | 0.016205000000  | -0.045888000000 |
| C | -1.131098000000 | 2.427256000000  | 0.703453000000  |
| C | -1.225274000000 | -2.493948000000 | 0.280454000000  |
| H | -0.933159000000 | 0.102051000000  | -1.137670000000 |
| C | -2.770196000000 | 0.031430000000  | -0.085578000000 |
| H | -1.640340000000 | 2.621316000000  | -0.249033000000 |
| H | -1.847394000000 | 2.600879000000  | 1.524361000000  |
| H | -0.295617000000 | 3.137212000000  | 0.796352000000  |
| H | -1.720051000000 | -2.508686000000 | -0.698895000000 |
| H | -0.415278000000 | -3.238411000000 | 0.266374000000  |
| H | -1.964586000000 | -2.775593000000 | 1.049385000000  |
| C | -3.455332000000 | 0.130500000000  | -1.294672000000 |
| C | -3.483749000000 | -0.059395000000 | 1.115386000000  |
| C | -4.851574000000 | 0.137512000000  | -1.311754000000 |
| H | -2.895871000000 | 0.202509000000  | -2.231615000000 |
| C | -4.875091000000 | -0.051845000000 | 1.099304000000  |
| H | -2.941777000000 | -0.137022000000 | 2.062757000000  |
| C | -5.559259000000 | 0.046459000000  | -0.115634000000 |
| H | -5.385729000000 | 0.214648000000  | -2.259431000000 |
| H | -5.431788000000 | -0.122828000000 | 2.034554000000  |
| H | -6.649879000000 | 0.051966000000  | -0.126618000000 |
| H | -0.132654000000 | -2.180927000000 | -3.357908000000 |
| C | 0.625076000000  | -2.257040000000 | -2.575478000000 |
| C | 1.043453000000  | -1.064014000000 | -1.926059000000 |
| C | 1.166685000000  | -3.469645000000 | -2.236477000000 |
| C | 2.029299000000  | -1.125230000000 | -0.899675000000 |
| C | 0.470271000000  | 0.182873000000  | -2.246575000000 |
| C | 2.145703000000  | -3.524746000000 | -1.216356000000 |
| H | 0.854878000000  | -4.381924000000 | -2.744625000000 |
| C | 2.570000000000  | -2.390939000000 | -0.558425000000 |
| N | 2.446645000000  | 0.030387000000  | -0.278659000000 |
| C | 1.053659000000  | 1.364106000000  | -1.747104000000 |
| H | 2.588869000000  | -4.485248000000 | -0.949205000000 |
| H | 3.342979000000  | -2.482844000000 | 0.199612000000  |
| C | 2.045299000000  | 1.268678000000  | -0.727363000000 |
| C | 3.397974000000  | -0.069888000000 | 0.831064000000  |
| C | 0.641863000000  | 2.641189000000  | -2.216494000000 |
| C | 2.603980000000  | 2.470062000000  | -0.220547000000 |
| H | 3.291109000000  | 0.796324000000  | 1.485607000000  |
| H | 3.148517000000  | -0.942199000000 | 1.441583000000  |
| H | 4.429587000000  | -0.143572000000 | 0.456910000000  |
| C | 1.196827000000  | 3.788912000000  | -1.713831000000 |
| H | -0.121942000000 | 2.682845000000  | -2.995540000000 |
| C | 2.186935000000  | 3.689294000000  | -0.708097000000 |
| H | 3.390242000000  | 2.451176000000  | 0.528733000000  |
| H | 0.889472000000  | 4.766718000000  | -2.084013000000 |
| H | 2.645483000000  | 4.597597000000  | -0.314364000000 |
| H | -0.177633000000 | 0.243471000000  | -3.124828000000 |

DAD = 3.0Å

TRS2: product state, electronic energy = -1284.51304682 Hartree

|   |                 |                 |                 |
|---|-----------------|-----------------|-----------------|
| C | 4.647656000000  | -0.769183000000 | -0.761701000000 |
| C | 4.897929000000  | -0.433345000000 | 0.587501000000  |
| C | 3.444267000000  | -0.470207000000 | -1.378808000000 |
| H | 5.423225000000  | -1.283536000000 | -1.329549000000 |
| C | 3.956175000000  | 0.224369000000  | 1.362670000000  |
| H | 5.859873000000  | -0.697183000000 | 1.027703000000  |
| C | 2.490688000000  | 0.199951000000  | -0.601833000000 |
| H | 3.254701000000  | -0.744228000000 | -2.416082000000 |
| C | 2.750548000000  | 0.548894000000  | 0.731083000000  |
| H | 4.150258000000  | 0.482864000000  | 2.403489000000  |
| N | 1.222859000000  | 0.664456000000  | -0.880052000000 |
| N | 1.633232000000  | 1.217589000000  | 1.182286000000  |
| C | 0.648507000000  | 1.171559000000  | 0.250455000000  |
| C | 0.593353000000  | 0.622209000000  | -2.190056000000 |
| C | 1.488602000000  | 1.793511000000  | 2.509321000000  |
| H | -0.802641000000 | 0.042266000000  | 1.018308000000  |
| C | -0.182903800000 | 2.384246380000  | -0.086479020000 |
| H | -0.483562000000 | 0.469082000000  | -2.063634000000 |
| H | 0.777795000000  | 1.563794000000  | -2.726001000000 |
| H | 1.013999000000  | -0.222841000000 | -2.747136000000 |
| H | 2.311774000000  | 2.496303000000  | 2.692419000000  |
| H | 0.535137000000  | 2.332021000000  | 2.557439000000  |
| H | 1.508089000000  | 1.001621000000  | 3.270743000000  |
| C | -1.571736200000 | 2.331468010000  | -0.223914410000 |
| C | 0.511971640000  | 3.577294870000  | -0.320626130000 |
| C | -2.267188000000 | 3.475184420000  | -0.618981020000 |
| H | -2.112971620000 | 1.401709660000  | -0.027835490000 |
| C | -0.191900390000 | 4.713572750000  | -0.709038510000 |
| H | 1.598581500000  | 3.611095550000  | -0.209313580000 |
| C | -1.579332710000 | 4.662570900000  | -0.860144950000 |
| H | -3.351081030000 | 3.435611670000  | -0.730126370000 |
| H | 0.345638040000  | 5.644178550000  | -0.894656460000 |
| H | -2.124960210000 | 5.556447680000  | -1.164607350000 |
| H | 1.328419000000  | -2.026513000000 | 2.440308000000  |
| C | 1.107900000000  | -2.259000000000 | 1.395499000000  |
| C | -0.087087000000 | -1.804353000000 | 0.846130000000  |
| C | 2.015828000000  | -2.996942000000 | 0.635326000000  |
| C | -0.416304000000 | -2.113721000000 | -0.491753000000 |
| C | -1.041405000000 | -0.922094000000 | 1.577412000000  |
| C | 1.692737000000  | -3.305876000000 | -0.682514000000 |
| H | 2.952530000000  | -3.341647000000 | 1.073987000000  |
| C | 0.486103000000  | -2.882579000000 | -1.242713000000 |
| N | -1.616373000000 | -1.615889000000 | -1.031788000000 |
| C | -2.473975000000 | -1.028789000000 | 1.164007000000  |
| H | 2.374503000000  | -3.906377000000 | -1.286830000000 |
| H | 0.244471000000  | -3.187561000000 | -2.259325000000 |
| C | -2.718662000000 | -1.378861000000 | -0.177930000000 |
| C | -1.895255000000 | -1.859227000000 | -2.433628000000 |
| C | -3.538059000000 | -0.759418000000 | 2.020204000000  |
| C | -4.043416000000 | -1.455717000000 | -0.627035000000 |
| H | -2.636608000000 | -1.133028000000 | -2.787573000000 |
| H | -0.982518000000 | -1.716629000000 | -3.022850000000 |
| H | -2.277694000000 | -2.877504000000 | -2.622413000000 |
| C | -4.854195000000 | -0.807306000000 | 1.561731000000  |
| H | -3.327790000000 | -0.506690000000 | 3.061334000000  |
| C | -5.097367000000 | -1.160382000000 | 0.238152000000  |
| H | -4.271667000000 | -1.760860000000 | -1.646165000000 |
| H | -5.680392000000 | -0.586106000000 | 2.237224000000  |
| H | -6.120890000000 | -1.224651000000 | -0.132868000000 |

H -0.822078410000 -0.470721700000 2.553616940000

TRS2: reactant state, electronic energy = -1284.51304339 Hartree

|   |                 |                 |                 |
|---|-----------------|-----------------|-----------------|
| C | 4.102548499023  | -1.902977336038 | -1.133336936826 |
| C | 4.643386227363  | -1.534997389101 | 0.094214558945  |
| C | 2.836699811423  | -1.440412797905 | -1.533803612697 |
| H | 4.671297057263  | -2.547734368552 | -1.803583280795 |
| C | 3.948578463443  | -0.683396904673 | 0.971831077542  |
| H | 5.632497355441  | -1.895657893021 | 0.377578763976  |
| C | 2.147904641656  | -0.607577204660 | -0.665573610124 |
| H | 2.421853653380  | -1.718064626300 | -2.503517678365 |
| C | 2.702498277566  | -0.224669734018 | 0.574980029783  |
| H | 4.389538582803  | -0.380275242403 | 1.921707630348  |
| N | 0.885812902035  | -0.029780368323 | -0.759466584964 |
| N | 1.780241942457  | 0.584830881064  | 1.218127750553  |
| C | 0.722690944968  | 0.943967158309  | 0.298489582301  |
| C | 0.191878308742  | 0.140624498751  | -2.010891553715 |
| C | 2.097210648798  | 1.417650645758  | 2.350967701800  |
| H | -0.274059576957 | 0.784484926701  | 0.793465193743  |
| C | 0.714988388755  | 2.403296834495  | -0.127732957839 |
| H | -0.855737502942 | 0.414299395191  | -1.812529016309 |
| H | 0.639517300642  | 0.928425529521  | -2.641285967481 |
| H | 0.207344655169  | -0.809420586779 | -2.563966513349 |
| H | 2.730247318981  | 2.280103254728  | 2.079685892659  |
| H | 1.166767352369  | 1.802661126425  | 2.791377471112  |
| H | 2.617387542978  | 0.820504474782  | 3.112659625874  |
| C | -0.423498185728 | 3.186082068073  | 0.055142593889  |
| C | 1.857609806352  | 2.960968419752  | -0.714519664342 |
| C | -0.426944620028 | 4.524759260589  | -0.341842133666 |
| H | -1.315005790624 | 2.745792470688  | 0.511938095520  |
| C | 1.854558280882  | 4.295295551344  | -1.110353672442 |
| H | 2.750889091884  | 2.345212481626  | -0.856417776352 |
| C | 0.711463037891  | 5.077660235716  | -0.923404143973 |
| H | -1.318214670007 | 5.135999618853  | -0.195200237274 |
| H | 2.745135300546  | 4.731080122624  | -1.564939567739 |
| H | 0.712081071265  | 6.123713845571  | -1.232339220046 |
| H | 0.605633548893  | -1.534284478932 | 2.765243409779  |
| C | 0.367504000019  | -2.005256097302 | 1.810858989117  |
| C | -0.806025992858 | -1.575936430195 | 1.125026714533  |
| C | 1.176374146386  | -2.970232586751 | 1.276048188372  |
| C | -1.155426224000 | -2.170492996568 | -0.133315172286 |
| C | -1.563690989487 | -0.503990135956 | 1.593076465826  |
| C | 0.822585621470  | -3.552821277157 | 0.034861449743  |
| H | 2.084007852685  | -3.289510667081 | 1.787410723423  |
| C | -0.317362253329 | -3.189099869978 | -0.649014440175 |
| N | -2.284560285211 | -1.745562481966 | -0.785628639134 |
| C | -2.806701087090 | -0.191853116233 | 0.998274047887  |
| H | 1.461148003016  | -4.330465400453 | -0.387031237715 |
| H | -0.561144050255 | -3.712366156197 | -1.569334494384 |
| C | -3.164976797601 | -0.843674259538 | -0.214457200357 |
| C | -2.594392791337 | -2.270062575206 | -2.117076329017 |
| C | -3.691775844260 | 0.756482837760  | 1.574619195904  |
| C | -4.424243999443 | -0.558294576720 | -0.793132392336 |
| H | -3.076416525388 | -1.487031927866 | -2.709136536394 |
| H | -1.670128410220 | -2.542800711594 | -2.629912934062 |
| H | -3.254375603915 | -3.147212937783 | -2.054137810605 |
| C | -4.902372841874 | 1.032956805927  | 0.988782736296  |
| H | -3.391237377766 | 1.249795643142  | 2.500791683367  |
| C | -5.265196768110 | 0.359543860797  | -0.197915692499 |
| H | -4.760851544162 | -1.072341467640 | -1.689759883182 |
| H | -5.585434464676 | 1.753293498025  | 1.438247137192  |
| H | -6.236088156490 | 0.557770544127  | -0.653654485920 |

H -1.342183282783 -0.113790387454 2.590673666882

TRS8: product state, electronic energy = -1284.52258417 Hartree

|   |                 |                 |                 |
|---|-----------------|-----------------|-----------------|
| C | -1.820435000000 | -1.932291000000 | 3.232024000000  |
| C | -1.868213000000 | -0.601321000000 | 3.705583000000  |
| C | -1.002029000000 | -2.304467000000 | 2.176151000000  |
| H | -2.445106000000 | -2.685385000000 | 3.713317000000  |
| C | -1.100634000000 | 0.404282000000  | 3.138039000000  |
| H | -2.527887000000 | -0.362051000000 | 4.540137000000  |
| C | -0.205746000000 | -1.296104000000 | 1.619300000000  |
| H | -0.968248000000 | -3.330000000000 | 1.808450000000  |
| C | -0.256809000000 | 0.025292000000  | 2.087106000000  |
| H | -1.143312000000 | 1.432530000000  | 3.497353000000  |
| N | 0.752622000000  | -1.325110000000 | 0.633385000000  |
| N | 0.674700000000  | 0.733657000000  | 1.362847000000  |
| C | 1.216990000000  | -0.058498000000 | 0.400524000000  |
| C | 1.081457000000  | -2.514184000000 | -0.141338000000 |
| C | 0.986298000000  | 2.140748000000  | 1.569895000000  |
| H | 0.623847000000  | 0.436159000000  | -1.337947000000 |
| C | 2.702521000000  | -0.032358000000 | 0.140801000000  |
| H | 1.790891000000  | -2.241895000000 | -0.929424000000 |
| H | 1.536228000000  | -3.268340000000 | 0.515668000000  |
| H | 0.164845000000  | -2.912470000000 | -0.600936000000 |
| H | 1.894340000000  | 2.386600000000  | 1.008034000000  |
| H | 0.152717000000  | 2.767019000000  | 1.218788000000  |
| H | 1.164998000000  | 2.310149000000  | 2.639391000000  |
| C | 3.282897000000  | 0.776054000000  | -0.840107000000 |
| C | 3.514722000000  | -0.802849000000 | 0.983553000000  |
| C | 4.668897000000  | 0.803950000000  | -0.993167000000 |
| H | 2.650013000000  | 1.388261000000  | -1.485177000000 |
| C | 4.896856000000  | -0.771479000000 | 0.824863000000  |
| H | 3.066427000000  | -1.417278000000 | 1.766950000000  |
| C | 5.474817000000  | 0.026861000000  | -0.163989000000 |
| H | 5.117755000000  | 1.433201000000  | -1.762135000000 |
| H | 5.527438000000  | -1.372239000000 | 1.481220000000  |
| H | 6.558638000000  | 0.044463000000  | -0.283921000000 |
| H | 0.397190000000  | 3.377043000000  | -2.373348000000 |
| C | -0.398175000000 | 3.155842000000  | -1.657913000000 |
| C | -0.797183000000 | 1.830936000000  | -1.492821000000 |
| C | -0.995732000000 | 4.187765000000  | -0.936283000000 |
| C | -1.843919000000 | 1.507340000000  | -0.601403000000 |
| C | -0.098599000000 | 0.712854000000  | -2.182932000000 |
| C | -2.037000000000 | 3.876792000000  | -0.066075000000 |
| H | -0.671722000000 | 5.219328000000  | -1.072809000000 |
| C | -2.467692000000 | 2.559211000000  | 0.092148000000  |
| N | -2.219190000000 | 0.165645000000  | -0.410988000000 |
| C | -0.821966000000 | -0.587012000000 | -2.263953000000 |
| H | -2.546284000000 | 4.668226000000  | 0.485468000000  |
| H | -3.317482000000 | 2.371964000000  | 0.743663000000  |
| C | -1.862238000000 | -0.826850000000 | -1.341237000000 |
| C | -3.305737000000 | -0.123529000000 | 0.505618000000  |
| C | -0.453337000000 | -1.571977000000 | -3.178046000000 |
| C | -2.500920000000 | -2.078653000000 | -1.372159000000 |
| H | -3.208179000000 | -1.146263000000 | 0.883424000000  |
| H | -3.245575000000 | 0.536480000000  | 1.375112000000  |
| H | -4.295521000000 | -0.006635000000 | 0.031213000000  |
| C | -1.069675000000 | -2.821669000000 | -3.182519000000 |
| H | 0.337088000000  | -1.348585000000 | -3.898071000000 |
| C | -2.096294000000 | -3.063925000000 | -2.273451000000 |
| H | -3.339899000000 | -2.294152000000 | -0.715171000000 |
| H | -0.768985000000 | -3.584804000000 | -3.900152000000 |
| H | -2.615436000000 | -4.023334000000 | -2.275116000000 |



H 0.71558800000 0.87811200000 -2.89996700000

TRS8: reactant state, electronic energy = -1284.52257955 Hartree

|   |                 |                 |                 |
|---|-----------------|-----------------|-----------------|
| C | -1.052703404686 | -1.650731816713 | 3.479188655842  |
| C | -1.046792939405 | -0.298112913263 | 3.809241236245  |
| C | -0.493887259883 | -2.105120622294 | 2.269537787453  |
| H | -1.474622868789 | -2.374948962101 | 4.176668706073  |
| C | -0.478968739034 | 0.657792549174  | 2.946923352526  |
| H | -1.465303044217 | 0.026336744799  | 4.762469937071  |
| C | 0.055588693954  | -1.161565653214 | 1.414922076337  |
| H | -0.474956244210 | -3.167751258467 | 2.024881345425  |
| C | 0.067757928533  | 0.211136486266  | 1.752299912410  |
| H | -0.444795429199 | 1.712377462711  | 3.223658754494  |
| N | 0.646876362285  | -1.301198054057 | 0.167963457311  |
| N | 0.678827266500  | 0.902246540169  | 0.719167753270  |
| C | 1.284552395318  | -0.051389785742 | -0.197927852504 |
| C | 1.174319148419  | -2.560420232364 | -0.302146719668 |
| C | 1.227988066830  | 2.226529392590  | 0.887165414008  |
| H | 0.971053858086  | 0.212407209589  | -1.244611127407 |
| C | 2.801582981486  | -0.013210142309 | -0.235005800331 |
| H | 1.517703830295  | -2.443901277792 | -1.338883571502 |
| H | 2.022168775249  | -2.916088453592 | 0.308675518321  |
| H | 0.378261344480  | -3.319114138442 | -0.289907004472 |
| H | 1.593091067981  | 2.592203617694  | -0.081775520624 |
| H | 0.439457580011  | 2.910180973392  | 1.235056960316  |
| H | 2.066886277448  | 2.246845984251  | 1.604217012105  |
| C | 3.475803968631  | 0.321533149726  | -1.407380266670 |
| C | 3.528716488490  | -0.307309815423 | 0.925370801652  |
| C | 4.871099571823  | 0.368680780604  | -1.427365510144 |
| H | 2.906510448338  | 0.548628880770  | -2.313247635865 |
| C | 4.919479810527  | -0.262102603119 | 0.906589368020  |
| H | 2.998186283713  | -0.570579168211 | 1.845610516508  |
| C | 5.591070867266  | 0.076970366001  | -0.271344331792 |
| H | 5.395282073423  | 0.632315761054  | -2.346712859515 |
| H | 5.485318987998  | -0.491139615089 | 1.810481081159  |
| H | 6.681122002366  | 0.112613721366  | -0.285034964002 |
| H | -0.187780190051 | 3.116579170068  | -2.721345296474 |
| C | -0.832095386466 | 2.979606704340  | -1.850920353536 |
| C | -1.235235422536 | 1.654612372513  | -1.515437179484 |
| C | -1.250135213676 | 4.049545585804  | -1.108584518475 |
| C | -2.070543643391 | 1.431334090864  | -0.376980965802 |
| C | -0.798632729487 | 0.556857205169  | -2.269249210204 |
| C | -2.090289073363 | 3.824631402333  | 0.010592307740  |
| H | -0.951488531085 | 5.063943951288  | -1.372010909382 |
| C | -2.491440307206 | 2.560463171549  | 0.375742549268  |
| N | -2.463043319933 | 0.151815054725  | -0.067536022520 |
| C | -1.337841665142 | -0.713007441196 | -2.033885695334 |
| H | -2.440606515554 | 4.675786753777  | 0.596413479503  |
| H | -3.158260096038 | 2.457378310696  | 1.226269045282  |
| C | -2.158656480052 | -0.909450553549 | -0.883310845415 |
| C | -3.265496960258 | -0.113773316394 | 1.132802744994  |
| C | -1.044927193904 | -1.814086465048 | -2.889653836057 |
| C | -2.664319908107 | -2.211171538669 | -0.626445229533 |
| H | -2.866345778116 | -0.997781715023 | 1.641355315717  |
| H | -3.170409191758 | 0.710148962974  | 1.837796230461  |
| H | -4.319623128510 | -0.264589603536 | 0.860699663982  |
| C | -1.552787582782 | -3.057171578511 | -2.628689957130 |
| H | -0.411709945961 | -1.636116325831 | -3.760748089326 |
| C | -2.366650923713 | -3.245717050256 | -1.482650132480 |
| H | -3.303764700702 | -2.404085960382 | 0.230362131133  |
| H | -1.339396492665 | -3.897321797092 | -3.289296698581 |
| H | -2.777121478078 | -4.235188627481 | -1.275337263144 |

H -0.307055721494 0.759653588907 -3.224661327249

DAD = 3.2Å

TRS2: product state, electronic energy = -1284.51471387 Hartree

|   |                 |                 |                 |
|---|-----------------|-----------------|-----------------|
| C | 4.772202000000  | -0.771565000000 | -0.639171000000 |
| C | 4.893120000000  | -0.615335000000 | 0.761711000000  |
| C | 3.642014000000  | -0.363512000000 | -1.325443000000 |
| H | 5.593349000000  | -1.230592000000 | -1.190173000000 |
| C | 3.890956000000  | -0.036899000000 | 1.521784000000  |
| H | 5.803428000000  | -0.959257000000 | 1.253471000000  |
| C | 2.625496000000  | 0.223858000000  | -0.560356000000 |
| H | 3.549723000000  | -0.495685000000 | -2.403066000000 |
| C | 2.755079000000  | 0.393409000000  | 0.824661000000  |
| H | 3.985364000000  | 0.080754000000  | 2.601128000000  |
| N | 1.394428000000  | 0.740659000000  | -0.896783000000 |
| N | 1.601708000000  | 1.015836000000  | 1.247071000000  |
| C | 0.712332000000  | 1.093558000000  | 0.229243000000  |
| C | 0.900658000000  | 0.846960000000  | -2.259356000000 |
| C | 1.320958000000  | 1.400884000000  | 2.620695000000  |
| H | -0.927222000000 | -0.063863000000 | 1.231836000000  |
| C | -0.115528000000 | 2.328428000000  | -0.016345000000 |
| H | -0.189540000000 | 0.938218000000  | -2.238412000000 |
| H | 1.337154000000  | 1.731054000000  | -2.744788000000 |
| H | 1.182811000000  | -0.062960000000 | -2.803584000000 |
| H | 2.131409000000  | 2.042447000000  | 2.989401000000  |
| H | 0.376705000000  | 1.956959000000  | 2.644688000000  |
| H | 1.243931000000  | 0.505664000000  | 3.253238000000  |
| C | -1.498728000000 | 2.281795000000  | -0.205843000000 |
| C | 0.575976000000  | 3.543479000000  | -0.093839000000 |
| C | -2.192040000000 | 3.458132000000  | -0.494559000000 |
| H | -2.031092000000 | 1.329498000000  | -0.135025000000 |
| C | -0.126275000000 | 4.711318000000  | -0.377397000000 |
| H | 1.657754000000  | 3.571283000000  | 0.058933000000  |
| C | -1.507572000000 | 4.668886000000  | -0.579364000000 |
| H | -3.271271000000 | 3.424719000000  | -0.645934000000 |
| H | 0.407768000000  | 5.660093000000  | -0.441118000000 |
| H | -2.051230000000 | 5.587962000000  | -0.801156000000 |
| H | 1.189786000000  | -2.362851000000 | 2.318044000000  |
| C | 0.996613000000  | -2.408415000000 | 1.243246000000  |
| C | -0.177059000000 | -1.846878000000 | 0.749921000000  |
| C | 1.915309000000  | -3.028904000000 | 0.393221000000  |
| C | -0.471241000000 | -1.923877000000 | -0.629435000000 |
| C | -1.160499000000 | -1.108470000000 | 1.601657000000  |
| C | 1.620574000000  | -3.117429000000 | -0.962595000000 |
| H | 2.834512000000  | -3.458224000000 | 0.792652000000  |
| C | 0.434195000000  | -2.584154000000 | -1.472805000000 |
| N | -1.643969000000 | -1.307129000000 | -1.109082000000 |
| C | -2.581616000000 | -1.144932000000 | 1.128214000000  |
| H | 2.305968000000  | -3.629147000000 | -1.640146000000 |
| H | 0.210334000000  | -2.719918000000 | -2.529684000000 |
| C | -2.779280000000 | -1.238530000000 | -0.262175000000 |
| C | -1.894880000000 | -1.316323000000 | -2.536912000000 |
| C | -3.675477000000 | -1.053612000000 | 1.982623000000  |
| C | -4.086899000000 | -1.233414000000 | -0.763511000000 |
| H | -2.594687000000 | -0.509284000000 | -2.787030000000 |
| H | -0.963402000000 | -1.130626000000 | -3.080797000000 |
| H | -2.318637000000 | -2.273136000000 | -2.889528000000 |
| C | -4.976152000000 | -1.021225000000 | 1.478709000000  |
| H | -3.502509000000 | -1.002658000000 | 3.059368000000  |
| C | -5.172698000000 | -1.114371000000 | 0.105448000000  |
| H | -4.278959000000 | -1.337121000000 | -1.829330000000 |
| H | -5.825978000000 | -0.937819000000 | 2.156010000000  |

|   |                 |                 |                 |
|---|-----------------|-----------------|-----------------|
| H | -6.182702000000 | -1.110389000000 | -0.305956000000 |
| H | -0.975170000000 | -0.827864000000 | 2.646368000000  |

TRS2: reactant state, electronic energy = -1284.51472695 Hartree

|   |                 |                 |                 |
|---|-----------------|-----------------|-----------------|
| C | 3.870932000000  | -2.329835000000 | -1.146339000000 |
| C | 4.454172000000  | -2.036705000000 | 0.081475000000  |
| C | 2.665280000000  | -1.720200000000 | -1.537534000000 |
| H | 4.359280000000  | -3.030001000000 | -1.824402000000 |
| C | 3.864566000000  | -1.116867000000 | 0.968003000000  |
| H | 5.396134000000  | -2.510899000000 | 0.358217000000  |
| C | 2.078284000000  | -0.821902000000 | -0.660324000000 |
| H | 2.218761000000  | -1.939821000000 | -2.508129000000 |
| C | 2.677367000000  | -0.515143000000 | 0.581774000000  |
| H | 4.341138000000  | -0.873464000000 | 1.917901000000  |
| N | 0.885701000000  | -0.107916000000 | -0.742014000000 |
| N | 1.855859000000  | 0.387765000000  | 1.237801000000  |
| C | 0.867366000000  | 0.897361000000  | 0.305082000000  |
| C | 0.218071000000  | 0.156324000000  | -1.990939000000 |
| C | 2.282365000000  | 1.174360000000  | 2.367578000000  |
| H | -0.139710750000 | 0.885143580000  | 0.792807410000  |
| C | 1.077765450000  | 2.342261220000  | -0.117080890000 |
| H | -0.795434000000 | 0.536879000000  | -1.788388000000 |
| H | 0.747273000000  | 0.901752000000  | -2.610036000000 |
| H | 0.133267000000  | -0.780590000000 | -2.559823000000 |
| H | 3.018924000000  | 1.949581000000  | 2.093504000000  |
| H | 1.410401000000  | 1.673628000000  | 2.812886000000  |
| H | 2.726067000000  | 0.515635000000  | 3.126941000000  |
| C | 0.070437230000  | 3.285588730000  | 0.076638340000  |
| C | 2.288755950000  | 2.728995540000  | -0.705253820000 |
| C | 0.265676420000  | 4.613185890000  | -0.309078640000 |
| H | -0.874799650000 | 2.979880870000  | 0.535130120000  |
| C | 2.483990310000  | 4.052026690000  | -1.090801980000 |
| H | 3.080321480000  | 1.988852010000  | -0.856078310000 |
| C | 1.471632000000  | 4.994973800000  | -0.891945870000 |
| H | -0.523691080000 | 5.349418280000  | -0.152754260000 |
| H | 3.427960300000  | 4.353402390000  | -1.546616970000 |
| H | 1.627429540000  | 6.031862980000  | -1.192439490000 |
| H | 0.322810000000  | -1.504119000000 | 2.811204000000  |
| C | 0.076137000000  | -1.953693000000 | 1.848730000000  |
| C | -1.053880000000 | -1.445417000000 | 1.139850000000  |
| C | 0.824657000000  | -2.974051000000 | 1.330685000000  |
| C | -1.405231000000 | -2.005820000000 | -0.135323000000 |
| C | -1.771993000000 | -0.352478000000 | 1.613392000000  |
| C | 0.461978000000  | -3.527631000000 | 0.078059000000  |
| H | 1.694218000000  | -3.359278000000 | 1.862282000000  |
| C | -0.628209000000 | -3.079064000000 | -0.635134000000 |
| N | -2.485037000000 | -1.500656000000 | -0.812298000000 |
| C | -2.967436000000 | 0.050087000000  | 0.984759000000  |
| H | 1.053735000000  | -4.348617000000 | -0.329557000000 |
| H | -0.882492000000 | -3.578950000000 | -1.565514000000 |
| C | -3.322270000000 | -0.552605000000 | -0.255598000000 |
| C | -2.790071000000 | -1.988227000000 | -2.159631000000 |
| C | -3.813030000000 | 1.040506000000  | 1.553023000000  |
| C | -4.539343000000 | -0.174233000000 | -0.871793000000 |
| H | -3.188240000000 | -1.164068000000 | -2.758136000000 |
| H | -1.873601000000 | -2.329409000000 | -2.643977000000 |
| H | -3.519419000000 | -2.810153000000 | -2.126375000000 |
| C | -4.981376000000 | 1.403993000000  | 0.932469000000  |
| H | -3.515034000000 | 1.494415000000  | 2.499692000000  |
| C | -5.341613000000 | 0.780720000000  | -0.283316000000 |
| H | -4.874989000000 | -0.644835000000 | -1.792184000000 |
| H | -5.634485000000 | 2.156213000000  | 1.374098000000  |

|   |                 |                 |                 |
|---|-----------------|-----------------|-----------------|
| H | -6.281087000000 | 1.050324000000  | -0.767476000000 |
| H | -1.564039080000 | -0.004266290000 | 2.629320210000  |

TRS8: product state, electronic energy = -1284.52352407 Hartree

|   |                 |                 |                 |
|---|-----------------|-----------------|-----------------|
| C | 2.212278428460  | -2.931534058274 | -2.197373664962 |
| C | 1.998545273918  | -2.023973544927 | -3.262318314432 |
| C | 1.479771092221  | -2.867137967346 | -1.023657208811 |
| H | 2.975671687915  | -3.702189107834 | -2.308058872755 |
| C | 1.047962478164  | -1.019886128394 | -3.188326606723 |
| H | 2.602266893235  | -2.120321409979 | -4.165094589738 |
| C | 0.499930549843  | -1.866809877069 | -0.955621891026 |
| H | 1.647417053049  | -3.561791352842 | -0.200700480793 |
| C | 0.292285240711  | -0.962792230140 | -2.008820316912 |
| H | 0.893176920255  | -0.316492707658 | -4.006359819600 |
| N | -0.427572823373 | -1.559511300383 | 0.010263861038  |
| N | -0.752653146986 | -0.154363262932 | -1.625697071229 |
| C | -1.110878595359 | -0.433394838817 | -0.349797707529 |
| C | -0.514145454017 | -2.245340935004 | 1.294324173903  |
| C | -1.337211376588 | 0.909188575140  | -2.432473029692 |
| H | -0.758853516031 | 0.831847394997  | 1.451775188952  |
| C | -2.567082185423 | -0.517180829305 | 0.030445949410  |
| H | -1.205215313460 | -1.698970801190 | 1.944409299063  |
| H | -0.884426340861 | -3.268339846572 | 1.142174835576  |
| H | 0.482489822634  | -2.263661780035 | 1.758913835653  |
| H | -2.356067041075 | 1.099522580980  | -2.075514231876 |
| H | -0.733629066155 | 1.824143433475  | -2.344035921209 |
| H | -1.375845172301 | 0.575667609422  | -3.476036798447 |
| C | -3.272698592423 | 0.588991935876  | 0.514457913236  |
| C | -3.232808179429 | -1.727400565806 | -0.202875216113 |
| C | -4.636063151682 | 0.482944586362  | 0.786023199501  |
| H | -2.750370938481 | 1.535220787910  | 0.674729602783  |
| C | -4.593891842771 | -1.825821225943 | 0.071468181813  |
| H | -2.692929354160 | -2.584607851359 | -0.609691933377 |
| C | -5.294649203899 | -0.725985995406 | 0.569307023700  |
| H | -5.183194388677 | 1.345709551937  | 1.166826690600  |
| H | -5.111875324680 | -2.768033276420 | -0.110788041125 |
| H | -6.360573806609 | -0.812609601526 | 0.783047308012  |
| H | -1.246930256704 | 3.845141700333  | 1.148392829735  |
| C | -0.468915905437 | 3.543980942773  | 0.442615192185  |
| C | 0.271377614940  | 2.397426890824  | 0.719449984922  |
| C | -0.222342077354 | 4.316334306759  | -0.693516625253 |
| C | 1.307443138914  | 1.996742658372  | -0.153556365105 |
| C | -0.023703565488 | 1.549147084054  | 1.914612180688  |
| C | 0.824327371518  | 3.950211753542  | -1.531725709161 |
| H | -0.813868775234 | 5.209253754004  | -0.894727220235 |
| C | 1.589726427803  | 2.813886916707  | -1.261714753472 |
| N | 2.011141641503  | 0.800553757077  | 0.085926326248  |
| C | 1.027923332137  | 0.560995120739  | 2.310426596931  |
| H | 1.074070098955  | 4.561666823403  | -2.399929489678 |
| H | 2.429514800619  | 2.595170888272  | -1.916496848407 |
| C | 2.002629533748  | 0.195540836738  | 1.358034952813  |
| C | 3.066404261785  | 0.422339753016  | -0.833219651209 |
| C | 1.018262708622  | -0.041231119253 | 3.565568987250  |
| C | 2.938820603055  | -0.791605347203 | 1.710365653333  |
| H | 3.191266418173  | -0.666186185510 | -0.827560743375 |
| H | 2.788684597101  | 0.698286928208  | -1.853849022771 |
| H | 4.032147767334  | 0.895745630616  | -0.583803646802 |
| C | 1.929891716294  | -1.042903588192 | 3.898426937946  |
| H | 0.271833159620  | 0.281991121775  | 4.294703053010  |
| C | 2.888783354435  | -1.411608286232 | 2.960363532919  |
| H | 3.736707942906  | -1.073346294975 | 1.027595549833  |
| H | 1.904361686748  | -1.509061606833 | 4.883257602164  |

|   |                 |                 |                |
|---|-----------------|-----------------|----------------|
| H | 3.632374744556  | -2.171679155748 | 3.203936007998 |
| H | -0.736370966514 | 1.853718755795  | 2.693079340600 |

TRS8: reactant state, electronic energy = -1284.52350503 Hartree

|   |                 |                 |                 |
|---|-----------------|-----------------|-----------------|
| C | -0.628651000000 | -1.960987000000 | 3.393610000000  |
| C | -0.683860000000 | -0.635043000000 | 3.809883000000  |
| C | -0.149651000000 | -2.300087000000 | 2.111887000000  |
| H | -0.935291000000 | -2.754933000000 | 4.075204000000  |
| C | -0.260621000000 | 0.410216000000  | 2.965645000000  |
| H | -1.034789000000 | -0.399047000000 | 4.815008000000  |
| C | 0.254256000000  | -1.270866000000 | 1.277070000000  |
| H | -0.078602000000 | -3.342362000000 | 1.798633000000  |
| C | 0.203601000000  | 0.077659000000  | 1.702010000000  |
| H | -0.269560000000 | 1.445633000000  | 3.308966000000  |
| N | 0.737046000000  | -1.291302000000 | -0.025943000000 |
| N | 0.666969000000  | 0.871786000000  | 0.663787000000  |
| C | 1.311026000000  | 0.011605000000  | -0.325546000000 |
| C | 1.307997000000  | -2.481435000000 | -0.610651000000 |
| C | 1.135808000000  | 2.220431000000  | 0.871416000000  |
| H | 0.967232000000  | 0.323941000000  | -1.342314000000 |
| C | 2.824439000000  | 0.127298000000  | -0.363191000000 |
| H | 1.550672000000  | -2.285861000000 | -1.664136000000 |
| H | 2.228217000000  | -2.807546000000 | -0.094870000000 |
| H | 0.569935000000  | -3.295919000000 | -0.576284000000 |
| H | 1.369729000000  | 2.675124000000  | -0.101168000000 |
| H | 0.341135000000  | 2.815885000000  | 1.344690000000  |
| H | 2.042325000000  | 2.263716000000  | 1.500265000000  |
| C | 3.471418000000  | 0.581471000000  | -1.510635000000 |
| C | 3.576994000000  | -0.210356000000 | 0.769452000000  |
| C | 4.862032000000  | 0.704887000000  | -1.533513000000 |
| H | 2.884044000000  | 0.842571000000  | -2.395315000000 |
| C | 4.963216000000  | -0.089260000000 | 0.747616000000  |
| H | 3.070922000000  | -0.567256000000 | 1.671562000000  |
| C | 5.606412000000  | 0.369651000000  | -0.405223000000 |
| H | 5.363427000000  | 1.061931000000  | -2.433872000000 |
| H | 5.547654000000  | -0.352362000000 | 1.630163000000  |
| H | 6.692893000000  | 0.464647000000  | -0.421000000000 |
| H | -0.795014000000 | 3.350683000000  | -2.580154000000 |
| C | -1.299018000000 | 3.102186000000  | -1.644527000000 |
| C | -1.551538000000 | 1.726929000000  | -1.362333000000 |
| C | -1.683338000000 | 4.079173000000  | -0.769556000000 |
| C | -2.201955000000 | 1.356505000000  | -0.141660000000 |
| C | -1.142405000000 | 0.726943000000  | -2.251409000000 |
| C | -2.334998000000 | 3.708030000000  | 0.434189000000  |
| H | -1.499138000000 | 5.130644000000  | -0.988608000000 |
| C | -2.589335000000 | 2.394223000000  | 0.749611000000  |
| N | -2.463482000000 | 0.032121000000  | 0.105570000000  |
| C | -1.526852000000 | -0.598448000000 | -2.040690000000 |
| H | -2.653495000000 | 4.484944000000  | 1.130859000000  |
| H | -3.111011000000 | 2.182789000000  | 1.677442000000  |
| C | -2.165603000000 | -0.943207000000 | -0.810381000000 |
| C | -3.117385000000 | -0.388270000000 | 1.352751000000  |
| C | -1.249397000000 | -1.614919000000 | -3.002781000000 |
| C | -2.513205000000 | -2.302602000000 | -0.584527000000 |
| H | -2.562282000000 | -1.228622000000 | 1.783868000000  |
| H | -3.084895000000 | 0.411756000000  | 2.088388000000  |
| H | -4.158760000000 | -0.673301000000 | 1.149182000000  |
| C | -1.600195000000 | -2.914312000000 | -2.765685000000 |
| H | -0.754992000000 | -1.324391000000 | -3.931351000000 |
| C | -2.235906000000 | -3.249233000000 | -1.541081000000 |
| H | -3.007242000000 | -2.609506000000 | 0.332819000000  |
| H | -1.397724000000 | -3.690566000000 | -3.503411000000 |

H -2.519062000000 -4.286065000000 -1.352907000000  
H -0.849781000000 1.046133000000 -3.256080000000

## The atom coordinates and electronic energies of the solution-phase TRS's

In Acetonitrile

DAD = 2.8Å

TRS2:product state, electronic energy = -1284.60046995

|   |                 |                 |                 |
|---|-----------------|-----------------|-----------------|
| C | 4.550066000000  | -0.702143000000 | -0.937732000000 |
| C | 4.857437000000  | -0.331776000000 | 0.390591000000  |
| C | 3.313377000000  | -0.435197000000 | -1.506163000000 |
| H | 5.307084000000  | -1.216492000000 | -1.531195000000 |
| C | 3.938869000000  | 0.324803000000  | 1.196426000000  |
| H | 5.843907000000  | -0.569122000000 | 0.791132000000  |
| C | 2.385483000000  | 0.235787000000  | -0.698591000000 |
| H | 3.077366000000  | -0.727860000000 | -2.529173000000 |
| C | 2.698837000000  | 0.611274000000  | 0.616027000000  |
| H | 4.167536000000  | 0.611149000000  | 2.223187000000  |
| N | 1.099740000000  | 0.673739000000  | -0.929002000000 |
| N | 1.590420000000  | 1.260692000000  | 1.112059000000  |
| C | 0.573486000000  | 1.197956000000  | 0.220199000000  |
| C | 0.405363000000  | 0.585112000000  | -2.204158000000 |
| C | 1.510824000000  | 1.867653000000  | 2.432373000000  |
| H | -0.796012000000 | 0.101619000000  | 0.764657000000  |
| C | -0.256684030000 | 2.419596240000  | -0.098724630000 |
| H | -0.652955000000 | 0.363085000000  | -2.027738000000 |
| H | 0.505039000000  | 1.533758000000  | -2.750348000000 |
| H | 0.852296000000  | -0.228694000000 | -2.786447000000 |
| H | 2.298000000000  | 2.626945000000  | 2.526900000000  |
| H | 0.527758000000  | 2.336618000000  | 2.548615000000  |
| H | 1.647348000000  | 1.097187000000  | 3.202654000000  |
| C | -1.636771720000 | 2.366199490000  | -0.303485270000 |
| C | 0.437690460000  | 3.625484830000  | -0.254864050000 |
| C | -2.323559890000 | 3.518630880000  | -0.687808330000 |
| H | -2.176671500000 | 1.425329680000  | -0.171901000000 |
| C | -0.256967820000 | 4.771682470000  | -0.633990000000 |
| H | 1.516872920000  | 3.662811090000  | -0.090102470000 |
| C | -1.635388470000 | 4.719809420000  | -0.852148670000 |
| H | -3.400869460000 | 3.474722570000  | -0.853418790000 |
| H | 0.283677920000  | 5.711043390000  | -0.759710250000 |
| H | -2.173869180000 | 5.621205940000  | -1.149292490000 |
| H | 1.378279000000  | -1.662891000000 | 2.563328000000  |
| C | 1.172015000000  | -2.069592000000 | 1.570172000000  |
| C | -0.017185000000 | -1.716888000000 | 0.938272000000  |
| C | 2.099600000000  | -2.902772000000 | 0.941070000000  |
| C | -0.320337000000 | -2.230792000000 | -0.342653000000 |
| C | -0.989745000000 | -0.739044000000 | 1.502514000000  |
| C | 1.808421000000  | -3.399184000000 | -0.327752000000 |
| H | 3.035928000000  | -3.160587000000 | 1.438306000000  |
| C | 0.607614000000  | -3.080124000000 | -0.965416000000 |
| N | -1.525093000000 | -1.857508000000 | -0.956882000000 |
| C | -2.415821000000 | -0.967598000000 | 1.115529000000  |
| H | 2.516872000000  | -4.057178000000 | -0.834789000000 |
| H | 0.396724000000  | -3.509862000000 | -1.943386000000 |
| C | -2.635770000000 | -1.525230000000 | -0.163124000000 |
| C | -1.746627000000 | -2.227349000000 | -2.341968000000 |
| C | -3.497912000000 | -0.600934000000 | 1.911481000000  |
| C | -3.953849000000 | -1.702681000000 | -0.608773000000 |
| H | -2.499703000000 | -1.560773000000 | -2.778937000000 |
| H | -0.816441000000 | -2.096126000000 | -2.906638000000 |
| H | -2.086303000000 | -3.271535000000 | -2.453827000000 |

|   |                 |                 |                 |
|---|-----------------|-----------------|-----------------|
| C | -4.808817000000 | -0.755926000000 | 1.453855000000  |
| H | -3.303558000000 | -0.174907000000 | 2.898190000000  |
| C | -5.026424000000 | -1.309647000000 | 0.194668000000  |
| H | -4.154837000000 | -2.153005000000 | -1.579626000000 |
| H | -5.649207000000 | -0.451935000000 | 2.079323000000  |
| H | -6.043764000000 | -1.450714000000 | -0.174803000000 |
| H | -0.777515220000 | -0.094368840000 | 2.364762980000  |

TRS2:reactant state, electronic energy = -1284.60046628

|   |                 |                 |                 |
|---|-----------------|-----------------|-----------------|
| C | 4.228005239291  | -1.413278708776 | -1.182812476193 |
| C | 4.724530614512  | -0.992530459926 | 0.044256829409  |
| C | 2.915576467918  | -1.084018135850 | -1.587921817245 |
| H | 4.859180733375  | -2.000394013207 | -1.851979058783 |
| C | 3.936574774569  | -0.219705020221 | 0.925858717775  |
| H | 5.744719205198  | -1.250665971040 | 0.333636656647  |
| C | 2.139496161860  | -0.337442950220 | -0.717840236463 |
| H | 2.524912581220  | -1.407280100810 | -2.554089897390 |
| C | 2.647839943501  | 0.098047515095  | 0.530787021084  |
| H | 4.332855621977  | 0.122886857484  | 1.882730706247  |
| N | 0.830619479263  | 0.103323496967  | -0.814867304075 |
| N | 1.639915592825  | 0.789911007352  | 1.172219266165  |
| C | 0.540759864963  | 1.023658152776  | 0.259544924090  |
| C | 0.090821179769  | 0.122301029527  | -2.051284079561 |
| C | 1.826095323437  | 1.591369661257  | 2.352514002184  |
| H | -0.420158669410 | 0.749692597246  | 0.752773257648  |
| C | 0.351279836984  | 2.483253621714  | -0.140605845054 |
| H | -0.955655069276 | 0.389285536743  | -1.845930454439 |
| H | 0.501961586354  | 0.846118534913  | -2.777671149621 |
| H | 0.107443280256  | -0.879558564699 | -2.506418116770 |
| H | 2.355527766167  | 2.538657755450  | 2.144605132354  |
| H | 0.845515052757  | 1.829265254746  | 2.788364118927  |
| H | 2.402895080968  | 1.023079593834  | 3.096115831686  |
| C | -0.831207495576 | 3.150446674843  | 0.179635569063  |
| C | 1.368211268436  | 3.162870398397  | -0.823621829904 |
| C | -1.002392420197 | 4.490757693770  | -0.176553094569 |
| H | -1.623348474502 | 2.615680451193  | 0.711533333731  |
| C | 1.198471837931  | 4.499032049710  | -1.179158521282 |
| H | 2.295754356612  | 2.640802599182  | -1.076152831251 |
| C | 0.011659756078  | 5.164364261692  | -0.855441656255 |
| H | -1.929745250284 | 5.007455934279  | 0.076764561193  |
| H | 1.992411888724  | 5.026505014905  | -1.710848069166 |
| H | -0.119842085058 | 6.211240866232  | -1.134928509436 |
| H | 0.925145377218  | -1.500768387145 | 2.720136672554  |
| C | 0.686970255188  | -2.042951068806 | 1.803654432062  |
| C | -0.507777421557 | -1.688420331864 | 1.111517114722  |
| C | 1.503143307969  | -3.029178471209 | 1.321449804691  |
| C | -0.865644787939 | -2.368487276312 | -0.097514224269 |
| C | -1.308443006762 | -0.632980014029 | 1.554225321406  |
| C | 1.143716887326  | -3.698023014240 | 0.123075317379  |
| H | 2.417994097069  | -3.305997030751 | 1.846103486770  |
| C | -0.004108645547 | -3.393175491329 | -0.571814479522 |
| N | -2.017784661432 | -2.025566096048 | -0.749393701466 |
| C | -2.583226525009 | -0.432779993115 | 0.984165414400  |
| H | 1.788241438124  | -4.492962646838 | -0.256815554985 |
| H | -0.247028551416 | -3.966103458350 | -1.462409544869 |
| C | -2.925883429937 | -1.148701663267 | -0.197286147931 |
| C | -2.323128280719 | -2.613302912889 | -2.058223742094 |
| C | -3.507249361842 | 0.489208546157  | 1.545939068979  |
| C | -4.207690946365 | -0.945937474518 | -0.768774638574 |
| H | -2.819679180819 | -1.861124044505 | -2.677533004217 |
| H | -1.396290474383 | -2.894110297387 | -2.561457655093 |
| H | -2.971215976586 | -3.493379853995 | -1.945549668334 |

|   |                 |                 |                 |
|---|-----------------|-----------------|-----------------|
| C | -4.739297485372 | 0.677602379308  | 0.972926350087  |
| H | -3.208799885490 | 1.032268121048  | 2.444662778769  |
| C | -5.083460510652 | -0.054782167595 | -0.187867555333 |
| H | -4.523669605905 | -1.502109893924 | -1.647771092687 |
| H | -5.453573270280 | 1.377664353188  | 1.406860658038  |
| H | -6.069643879932 | 0.080323207660  | -0.634910091422 |
| H | -1.071509505593 | -0.159033653806 | 2.510917700194  |

TRS8:product state, electronic energy = -1284.60536585

|   |                 |                 |                  |
|---|-----------------|-----------------|------------------|
| C | -1.802911110998 | -1.573887938575 | 3.373708580808   |
| C | -1.883731520855 | -0.197586360041 | 3.682023478944   |
| C | -0.966201988884 | -2.053225750540 | 2.374901844731   |
| H | -2.417624875108 | -2.278099905211 | 3.936060506379   |
| C | -1.130889880751 | 0.749845705190  | 3.001852875626   |
| H | -2.558783050958 | 0.127728591863  | 4.474714834534   |
| C | -0.190373543156 | -1.101632829473 | 1.703342273405   |
| H | -0.902313785435 | -3.114382177690 | 2.132506162389   |
| C | -0.272551024395 | 0.264988747233  | 2.009127382990   |
| H | -1.192629963570 | 1.813984663006  | 3.231429136994   |
| N | 0.767485010598  | -1.227954260900 | 0.725975782403   |
| N | 0.640008966755  | 0.904493917791  | 1.202778943952   |
| C | 1.205216559387  | 0.014246123759  | 0.337968424357   |
| C | 1.156914596810  | -2.500860188755 | 0.140024815459   |
| C | 0.947080743605  | 2.323726799959  | 1.280817469346   |
| H | 0.639070723469  | 0.305784866134  | -1.214999997814  |
| C | 2.703395845833  | 0.036905364109  | 0.121837401901   |
| H | 1.831657908565  | -2.319067757950 | -0.702781558086  |
| H | 1.665864818822  | -3.113413923773 | 0.897202217981   |
| H | 0.257814698332  | -3.023156307222 | -0.217075196229  |
| H | 1.719648119034  | 2.563532138150  | 0.542438746326   |
| H | 0.041988582815  | 2.910012044044  | 1.067620412018   |
| H | 1.312957921597  | 2.557012297836  | 2.289809136541   |
| C | 3.309087960190  | 0.724243898075  | -0.932580991193  |
| C | 3.493142394485  | -0.610566288296 | 1.081456163148   |
| C | 4.700295902259  | 0.751076780957  | -1.040763390102  |
| H | 2.697883869529  | 1.246752837215  | -1.669897477590  |
| C | 4.880398451778  | -0.579938145052 | 0.967206786313   |
| H | 3.023899042819  | -1.132341798571 | 1.917957108469   |
| C | 5.485925811163  | 0.095999685789  | -0.094357379933  |
| H | 5.167817170070  | 1.286437153616  | -1.868274556806  |
| H | 5.491717534865  | -1.086601102622 | 1.715592601570   |
| H | 6.573654206335  | 0.113834928434  | -0.179697895866  |
| H | 0.403984123563  | 3.112648933299  | -2.556572019320  |
| C | -0.438266284786 | 2.947969473252  | -1.880566805751  |
| C | -0.814738973228 | 1.634283734490  | -1.597920755066  |
| C | -1.105376763432 | 4.029790318350  | -1.3099354666033 |
| C | -1.908057441905 | 1.375629582361  | -0.739706183317  |
| C | -0.050144621027 | 0.476569069006  | -2.121775322941  |
| C | -2.185862026927 | 3.779777398125  | -0.465027863205  |
| H | -0.793648998475 | 5.051531175935  | -1.529702418731  |
| C | -2.593689322827 | 2.474941242689  | -0.190441971480  |
| N | -2.271476632321 | 0.054898859172  | -0.441548777345  |
| C | -0.748634493054 | -0.833808539939 | -2.123391882928  |
| H | -2.737733777944 | 4.608712467429  | -0.018166318702  |
| H | -3.463514650885 | 2.326958450384  | 0.445309263812   |
| C | -1.842931802279 | -1.008948400172 | -1.247380848741  |
| C | -3.369975772769 | -0.178331985601 | 0.478851770665   |
| C | -0.313979508417 | -1.891070331142 | -2.922997161176  |
| C | -2.464345616238 | -2.270449612986 | -1.200666332655  |
| H | -3.251016935931 | -1.156359007633 | 0.956146262812   |
| H | -3.352609096315 | 0.568541531536  | 1.277457209857   |
| H | -4.350042369523 | -0.141539922363 | -0.027720894536  |



|   |                 |                 |                 |
|---|-----------------|-----------------|-----------------|
| C | -0.919699317200 | -3.144036480355 | -2.855684884925 |
| H | 0.526728632686  | -1.719069521587 | -3.599213617445 |
| C | -1.996202717777 | -3.322458890435 | -1.987777975082 |
| H | -3.328564534200 | -2.442960932926 | -0.562879684968 |
| H | -0.562303246808 | -3.965876330965 | -3.477275241528 |
| H | -2.498032018784 | -4.289827794560 | -1.926108082992 |
| H | 0.806047071798  | 0.589057706148  | -2.797679641244 |

TRS8:reactant state, electronic energy = -1284.60536391

|   |                 |                 |                 |
|---|-----------------|-----------------|-----------------|
| C | -1.276026228049 | -1.445510629682 | 3.509451867197  |
| C | -1.261140256549 | -0.079029405159 | 3.773731584369  |
| C | -0.650367827034 | -1.971447820817 | 2.360847852312  |
| H | -1.769983071264 | -2.126686577673 | 4.204397385097  |
| C | -0.618040603706 | 0.823926463172  | 2.903486789099  |
| H | -1.744771471105 | 0.304091907495  | 4.673890457561  |
| C | -0.025491739898 | -1.081720960227 | 1.500008037022  |
| H | -0.649237396178 | -3.043647359345 | 2.159043358497  |
| C | -0.006165555606 | 0.307252748178  | 1.770623917706  |
| H | -0.591435925790 | 1.893369794937  | 3.118146117492  |
| N | 0.645101636815  | -1.292114584799 | 0.310673510196  |
| N | 0.684140386715  | 0.930509347694  | 0.750665431091  |
| C | 1.270975202837  | -0.063897586854 | -0.126394648384 |
| C | 1.140872530883  | -2.585280756211 | -0.092383484804 |
| C | 1.218999159837  | 2.264767010668  | 0.865643690064  |
| H | 0.971433677686  | 0.149608087160  | -1.188168325145 |
| C | 2.792565255188  | -0.048752331891 | -0.154079286921 |
| H | 1.543726213656  | -2.519024962260 | -1.111649491907 |
| H | 1.935987460751  | -2.954986947237 | 0.579655276029  |
| H | 0.315223518296  | -3.312042839282 | -0.097980423885 |
| H | 1.646478100479  | 2.569743777543  | -0.098325580828 |
| H | 0.411194923503  | 2.967415845804  | 1.119261594033  |
| H | 2.005600171814  | 2.332948819247  | 1.638462392354  |
| C | 3.477602197069  | 0.243268406256  | -1.332859441845 |
| C | 3.509586495490  | -0.316473576173 | 1.018914067992  |
| C | 4.874615058951  | 0.272281483917  | -1.344770912067 |
| H | 2.913495562265  | 0.451157394118  | -2.246276358465 |
| C | 4.902154767959  | -0.289256674526 | 1.007831407935  |
| H | 2.969395533006  | -0.545295890774 | 1.942491631836  |
| C | 5.585870124840  | 0.005984092927  | -0.175864410319 |
| H | 5.406559692720  | 0.502779763710  | -2.269432563434 |
| H | 5.459153387156  | -0.498390146204 | 1.922857583986  |
| H | 6.677133974487  | 0.027660709915  | -0.183814443184 |
| H | 0.154501100850  | 2.934266843408  | -2.713267160668 |
| C | -0.598400149413 | 2.863617157432  | -1.925714472732 |
| C | -1.064150043804 | 1.567933644280  | -1.564131234472 |
| C | -1.089763139082 | 3.981281310957  | -1.305755939854 |
| C | -2.037600650038 | 1.422932670216  | -0.530002077880 |
| C | -0.555318439733 | 0.419401476200  | -2.193074503243 |
| C | -2.062771702230 | 3.833107753421  | -0.286500536859 |
| H | -0.742590919861 | 4.975510170332  | -1.587780931894 |
| C | -2.527681678906 | 2.596844685062  | 0.101679570595  |
| N | -2.485592650202 | 0.169635270290  | -0.192128309452 |
| C | -1.181148654211 | -0.818832706068 | -1.979292546952 |
| H | -2.466728488134 | 4.721447342577  | 0.201972855855  |
| H | -3.297283876047 | 2.545296389006  | 0.866929164332  |
| C | -2.142949331531 | -0.934122334466 | -0.932991546930 |
| C | -3.400647112192 | -0.009593191952 | 0.940198638631  |
| C | -0.836450942211 | -1.961085328866 | -2.755537419121 |
| C | -2.735280162831 | -2.202177882886 | -0.694256871413 |
| H | -3.126242948104 | -0.922288622067 | 1.478393227924  |
| H | -3.295529935989 | 0.819686035383  | 1.640128676502  |
| H | -4.438900415983 | -0.076870053785 | 0.586196841832  |

|   |                 |                 |                 |
|---|-----------------|-----------------|-----------------|
| C | -1.430706085668 | -3.171723148246 | -2.517188282025 |
| H | -0.089907289736 | -1.838573009407 | -3.542631963752 |
| C | -2.383127409554 | -3.281266537897 | -1.473334360130 |
| H | -3.485456103528 | -2.332466626877 | 0.081394744112  |
| H | -1.175197935380 | -4.047022611268 | -3.114848345590 |
| H | -2.860174457927 | -4.244153215286 | -1.282585397894 |
| H | 0.077266964217  | 0.552814066879  | -3.074334119603 |

In Chloroform

DAD = 2.8Å

TRS2:product state, electronic energy = -1284.58886073

|   |                 |                 |                 |
|---|-----------------|-----------------|-----------------|
| C | 4.602512000000  | -0.644045000000 | -0.865787000000 |
| C | 4.881232000000  | -0.264973000000 | 0.465447000000  |
| C | 3.370291000000  | -0.401906000000 | -1.453837000000 |
| H | 5.378310000000  | -1.145640000000 | -1.445384000000 |
| C | 3.937882000000  | 0.377252000000  | 1.253801000000  |
| H | 5.865125000000  | -0.482806000000 | 0.882660000000  |
| C | 2.417422000000  | 0.254583000000  | -0.664745000000 |
| H | 3.157981000000  | -0.702892000000 | -2.479466000000 |
| C | 2.703061000000  | 0.640700000000  | 0.652749000000  |
| H | 4.147654000000  | 0.670254000000  | 2.282723000000  |
| N | 1.127207000000  | 0.670182000000  | -0.917450000000 |
| N | 1.575446000000  | 1.274992000000  | 1.127332000000  |
| C | 0.570044000000  | 1.186589000000  | 0.221476000000  |
| C | 0.462740000000  | 0.577982000000  | -2.207747000000 |
| C | 1.463859000000  | 1.886895000000  | 2.442351000000  |
| H | -0.763687000000 | 0.087569000000  | 0.790634000000  |
| C | -0.283197000000 | 2.387395000000  | -0.114358000000 |
| H | -0.589439000000 | 0.310739000000  | -2.059323000000 |
| H | 0.532856000000  | 1.539502000000  | -2.735777000000 |
| H | 0.954810000000  | -0.205079000000 | -2.795443000000 |
| H | 2.229958000000  | 2.666585000000  | 2.546449000000  |
| H | 0.470140000000  | 2.337624000000  | 2.542246000000  |
| H | 1.606646000000  | 1.127771000000  | 3.223216000000  |
| C | -1.661448000000 | 2.298761000000  | -0.320107000000 |
| C | 0.382845000000  | 3.607483000000  | -0.283566000000 |
| C | -2.374295000000 | 3.429955000000  | -0.719401000000 |
| H | -2.181470000000 | 1.348403000000  | -0.175481000000 |
| C | -0.337820000000 | 4.731806000000  | -0.677845000000 |
| H | 1.460460000000  | 3.672546000000  | -0.116570000000 |
| C | -1.714085000000 | 4.644245000000  | -0.897558000000 |
| H | -3.450078000000 | 3.359071000000  | -0.884739000000 |
| H | 0.179731000000  | 5.682515000000  | -0.814030000000 |
| H | -2.272874000000 | 5.529114000000  | -1.206059000000 |
| H | 1.423186000000  | -1.735025000000 | 2.509525000000  |
| C | 1.203416000000  | -2.105876000000 | 1.505445000000  |
| C | 0.003411000000  | -1.737646000000 | 0.903828000000  |
| C | 2.122704000000  | -2.915181000000 | 0.836988000000  |
| C | -0.321455000000 | -2.215796000000 | -0.384807000000 |
| C | -0.958020000000 | -0.774825000000 | 1.509059000000  |
| C | 1.810253000000  | -3.377017000000 | -0.439276000000 |
| H | 3.067166000000  | -3.185885000000 | 1.310682000000  |
| C | 0.597126000000  | -3.046047000000 | -1.045527000000 |
| N | -1.536439000000 | -1.822512000000 | -0.968979000000 |
| C | -2.390798000000 | -0.983103000000 | 1.139923000000  |
| H | 2.510115000000  | -4.021424000000 | -0.974493000000 |
| H | 0.366693000000  | -3.457503000000 | -2.026842000000 |
| C | -2.634795000000 | -1.511301000000 | -0.145548000000 |
| C | -1.791209000000 | -2.178302000000 | -2.351602000000 |
| C | -3.457203000000 | -0.630344000000 | 1.963046000000  |
| C | -3.960649000000 | -1.677777000000 | -0.570058000000 |

|   |                 |                 |                 |
|---|-----------------|-----------------|-----------------|
| H | -2.553599000000 | -1.507284000000 | -2.765266000000 |
| H | -0.875806000000 | -2.043096000000 | -2.939111000000 |
| H | -2.134178000000 | -3.221081000000 | -2.466993000000 |
| C | -4.775290000000 | -0.771789000000 | 1.525875000000  |
| H | -3.245896000000 | -0.230576000000 | 2.957093000000  |
| C | -5.016903000000 | -1.299441000000 | 0.260256000000  |
| H | -4.181720000000 | -2.112408000000 | -1.543415000000 |
| H | -5.603660000000 | -0.481509000000 | 2.173062000000  |
| H | -6.041048000000 | -1.433428000000 | -0.091949000000 |
| H | -0.730675000000 | -0.154331000000 | 2.384876000000  |

TRS2:reactant state, electronic energy = -1284.58886184

|   |                 |                 |                 |
|---|-----------------|-----------------|-----------------|
| C | 4.224717000000  | -1.411023000000 | -1.204327000000 |
| C | 4.735451000000  | -0.978648000000 | 0.013499000000  |
| C | 2.905528000000  | -1.097569000000 | -1.590547000000 |
| H | 4.853260000000  | -1.993041000000 | -1.879895000000 |
| C | 3.955094000000  | -0.210240000000 | 0.901798000000  |
| H | 5.763173000000  | -1.223080000000 | 0.286459000000  |
| C | 2.137316000000  | -0.351192000000 | -0.713297000000 |
| H | 2.506034000000  | -1.425724000000 | -2.551387000000 |
| C | 2.658263000000  | 0.094205000000  | 0.522963000000  |
| H | 4.365479000000  | 0.144728000000  | 1.848034000000  |
| N | 0.823969000000  | 0.087356000000  | -0.799912000000 |
| N | 1.654244000000  | 0.788837000000  | 1.174331000000  |
| C | 0.543993000000  | 1.009850000000  | 0.273752000000  |
| C | 0.093930000000  | 0.128478000000  | -2.041963000000 |
| C | 1.874759000000  | 1.631661000000  | 2.320966000000  |
| H | -0.412858290000 | 0.726595930000  | 0.781499390000  |
| C | 0.339807950000  | 2.464500340000  | -0.134149210000 |
| H | -0.947486000000 | 0.421953000000  | -1.847014000000 |
| H | 0.527585000000  | 0.844959000000  | -2.761928000000 |
| H | 0.090885000000  | -0.871712000000 | -2.501286000000 |
| H | 2.409151000000  | 2.564104000000  | 2.066266000000  |
| H | 0.908209000000  | 1.901026000000  | 2.769685000000  |
| H | 2.461007000000  | 1.084538000000  | 3.073089000000  |
| C | -0.845491360000 | 3.126214280000  | 0.184804140000  |
| C | 1.351528660000  | 3.145965650000  | -0.822720340000 |
| C | -1.026023940000 | 4.463195470000  | -0.177573690000 |
| H | -1.634763560000 | 2.590883800000  | 0.720538320000  |
| C | 1.172330090000  | 4.478714840000  | -1.184145200000 |
| H | 2.282334240000  | 2.628581190000  | -1.072889170000 |
| C | -0.017359210000 | 5.138534750000  | -0.861374870000 |
| H | -1.955410510000 | 4.976240920000  | 0.074943110000  |
| H | 1.962335310000  | 5.008492320000  | -1.719014410000 |
| H | -0.155046570000 | 6.183265690000  | -1.145096260000 |
| H | 0.905199000000  | -1.465382000000 | 2.753778000000  |
| C | 0.681389000000  | -2.005433000000 | 1.832714000000  |
| C | -0.515099000000 | -1.670577000000 | 1.134854000000  |
| C | 1.523811000000  | -2.968566000000 | 1.348674000000  |
| C | -0.853044000000 | -2.355418000000 | -0.077716000000 |
| C | -1.330913000000 | -0.620979000000 | 1.564212000000  |
| C | 1.184798000000  | -3.639180000000 | 0.147074000000  |
| H | 2.444246000000  | -3.223973000000 | 1.873634000000  |
| C | 0.028860000000  | -3.362332000000 | -0.547278000000 |
| N | -2.006081000000 | -2.029982000000 | -0.739806000000 |
| C | -2.603771000000 | -0.431704000000 | 0.978630000000  |
| H | 1.851099000000  | -4.414868000000 | -0.234552000000 |
| H | -0.200125000000 | -3.941577000000 | -1.437413000000 |
| C | -2.930217000000 | -1.158720000000 | -0.200011000000 |
| C | -2.292282000000 | -2.633342000000 | -2.044372000000 |
| C | -3.542908000000 | 0.481322000000  | 1.526975000000  |
| C | -4.209960000000 | -0.974641000000 | -0.779918000000 |

|   |                |                |                |
|---|----------------|----------------|----------------|
| H | -2.81146000000 | -1.90271800000 | -2.67098800000 |
| H | -1.35665600000 | -2.88805000000 | -2.54618200000 |
| H | -2.91125900000 | -3.53457100000 | -1.93092500000 |
| C | -4.77323200000 | 0.65438800000  | 0.94386400000  |
| H | -3.26293100000 | 1.03187200000  | 2.42713300000  |
| C | -5.10082400000 | -0.08832000000 | -0.21301100000 |
| H | -4.51645900000 | -1.54189100000 | -1.65508600000 |
| H | -5.49789700000 | 1.34839300000  | 1.36989000000  |
| H | -6.08521500000 | 0.03188900000  | -0.66784100000 |
| H | -1.11054457000 | -0.13917169000 | 2.52062922000  |

TRS8:product state, electronic energy = -1284.59556304

|   |                 |                 |                 |
|---|-----------------|-----------------|-----------------|
| C | -1.827955196645 | -1.468789618714 | 3.411131720771  |
| C | -1.898355494112 | -0.085121754818 | 3.684070225422  |
| C | -0.991924745781 | -1.980249779482 | 2.427798720541  |
| H | -2.449740759090 | -2.153181214226 | 3.989724445131  |
| C | -1.135358154651 | 0.837516693042  | 2.981699455466  |
| H | -2.572184375195 | 0.265683900876  | 4.466692563001  |
| C | -0.204449699027 | -1.053843014829 | 1.735325766064  |
| H | -0.939143714485 | -3.048219272110 | 2.214284034530  |
| C | -0.277067080203 | 0.320394599295  | 2.005981619601  |
| H | -1.189402077853 | 1.907813683284  | 3.183223549396  |
| N | 0.758529148142  | -1.212859174094 | 0.766392184995  |
| N | 0.644530894360  | 0.932828029007  | 1.188564305432  |
| C | 1.206916048742  | 0.016794726147  | 0.347328772381  |
| C | 1.137508252550  | -2.503903094758 | 0.213878348529  |
| C | 0.957065889635  | 2.351951886022  | 1.232511851738  |
| H | 0.639361676029  | 0.268242855314  | -1.204118673671 |
| C | 2.704168713116  | 0.030491055327  | 0.128808651539  |
| H | 1.835975537513  | -2.352889409565 | -0.615653986855 |
| H | 1.619950394851  | -3.111272584448 | 0.992556991401  |
| H | 0.239423256332  | -3.018367974515 | -0.157425132109 |
| H | 1.760858716530  | 2.564113321456  | 0.519080161729  |
| H | 0.066412738935  | 2.938407175791  | 0.964805965919  |
| H | 1.288818458061  | 2.615772280555  | 2.245842631486  |
| C | 3.309128275980  | 0.695498547359  | -0.940508760045 |
| C | 3.496441399736  | -0.596954398909 | 1.099479682605  |
| C | 4.699741743045  | 0.718918693984  | -1.052891906997 |
| H | 2.698488206127  | 1.204346455809  | -1.687934053485 |
| C | 4.883078236522  | -0.570540737756 | 0.981123470005  |
| H | 3.029315960819  | -1.099217315323 | 1.949033653968  |
| C | 5.486495659972  | 0.082212681335  | -0.095595675499 |
| H | 5.166387448238  | 1.236878121861  | -1.891727970611 |
| H | 5.496251440665  | -1.061531920475 | 1.738191318200  |
| H | 6.573773605140  | 0.096809063262  | -0.184271350958 |
| H | 0.404806443088  | 3.048668387709  | -2.645325928281 |
| C | -0.429383432327 | 2.898515229939  | -1.956084219226 |
| C | -0.802384937693 | 1.592461979885  | -1.636030758480 |
| C | -1.095209072590 | 3.994144582361  | -1.412514396951 |
| C | -1.896082213398 | 1.355539144172  | -0.772519216849 |
| C | -0.039169358703 | 0.420453055445  | -2.127415344951 |
| C | -2.172097506413 | 3.765642112272  | -0.557346513852 |
| H | -0.788920072345 | 5.009902204925  | -1.664328999604 |
| C | -2.579019287856 | 2.468555547942  | -0.248763485026 |
| N | -2.263140758279 | 0.042499775716  | -0.445413162965 |
| C | -0.739421676928 | -0.887985641467 | -2.103221814400 |
| H | -2.724622757956 | 4.606031280221  | -0.133627825184 |
| H | -3.449742901780 | 2.336850425294  | 0.389190380356  |
| C | -1.838323700891 | -1.039756675426 | -1.229366592888 |
| C | -3.371888437029 | -0.163195282179 | 0.468747583327  |
| C | -0.306354283121 | -1.962454416493 | -2.880605514499 |
| C | -2.46727777481  | -2.296310124274 | -1.163499522108 |

|   |                 |                 |                 |
|---|-----------------|-----------------|-----------------|
| H | -3.273144720584 | -1.137629564767 | 0.957410618527  |
| H | -3.346242206912 | 0.590448298063  | 1.260919958253  |
| H | -4.347676373956 | -0.114114305072 | -0.044997738721 |
| C | -0.918122623893 | -3.210256521763 | -2.791828675352 |
| H | 0.533800587251  | -1.807730373752 | -3.561742759106 |
| C | -2.000922198865 | -3.365388097375 | -1.927492166872 |
| H | -3.340131860415 | -2.450666950698 | -0.533105353684 |
| H | -0.565411102285 | -4.044665413827 | -3.398800361464 |
| H | -2.511417519551 | -4.327232431410 | -1.854297579010 |
| H | 0.825893346912  | 0.512318268857  | -2.794918190608 |

TRS8:reactant state, electronic energy = -1284.59556494

|   |                 |                 |                 |
|---|-----------------|-----------------|-----------------|
| C | -1.333300234158 | -1.462812559617 | 3.491072563763  |
| C | -1.321724345454 | -0.096834127647 | 3.762336110150  |
| C | -0.692753484198 | -1.983166688136 | 2.350408711556  |
| H | -1.832748889856 | -2.146647999714 | 4.179065703748  |
| C | -0.666586479548 | 0.808970967703  | 2.907295250887  |
| H | -1.813919488676 | 0.280111481957  | 4.660162514181  |
| C | -0.055282754997 | -1.088910609557 | 1.502850070688  |
| H | -0.685867495947 | -3.054798672192 | 2.146479167416  |
| C | -0.038551387423 | 0.297088993919  | 1.780534930461  |
| H | -0.637793172939 | 1.876373158339  | 3.131041153412  |
| N | 0.635610728354  | -1.294607030967 | 0.323536832250  |
| N | 0.671793116415  | 0.925164326542  | 0.775947315079  |
| C | 1.262528365355  | -0.064312399944 | -0.100838455572 |
| C | 1.139270918500  | -2.586865827530 | -0.073977071364 |
| C | 1.211605880758  | 2.255940244907  | 0.913454583453  |
| H | 0.959294965975  | 0.155316908648  | -1.165307627846 |
| C | 2.783281056832  | -0.050301268651 | -0.131839886366 |
| H | 1.574014791302  | -2.515777665352 | -1.079571984141 |
| H | 1.913068270908  | -2.963355807242 | 0.618075534667  |
| H | 0.311886111788  | -3.310698671314 | -0.111404743681 |
| H | 1.673134686871  | 2.562943289256  | -0.033812945422 |
| H | 0.400789604655  | 2.963555627079  | 1.142358877211  |
| H | 1.973996846858  | 2.314882966594  | 1.710237406623  |
| C | 3.469564573091  | 0.227912784457  | -1.312893401762 |
| C | 3.498870641325  | -0.310490809191 | 1.043326053564  |
| C | 4.866222339569  | 0.251166064957  | -1.325697334375 |
| H | 2.908724985905  | 0.429908182549  | -2.229839120071 |
| C | 4.890930273898  | -0.288942318568 | 1.031424912155  |
| H | 2.957064732375  | -0.528943342449 | 1.968421097833  |
| C | 5.575501588123  | -0.007230914961 | -0.154561332272 |
| H | 5.399515150984  | 0.470930964807  | -2.251986918235 |
| H | 5.447252757222  | -0.492137302413 | 1.947971858347  |
| H | 6.666658752757  | 0.009926670732  | -0.162649384805 |
| H | 0.200479133683  | 2.946522307830  | -2.707163503987 |
| C | -0.557338429793 | 2.872488071839  | -1.924530654696 |
| C | -1.031701112568 | 1.577613927566  | -1.573186812905 |
| C | -1.047574873034 | 3.990740628078  | -1.304579311529 |
| C | -2.014698847059 | 1.433417097930  | -0.548650314536 |
| C | -0.522438190177 | 0.427376195169  | -2.201373336540 |
| C | -2.030988765184 | 3.843750276382  | -0.296163878483 |
| H | -0.693033712427 | 4.983924509080  | -1.580618325321 |
| C | -2.504972093700 | 2.607551227914  | 0.081227797575  |
| N | -2.471683578858 | 0.180451303494  | -0.217367774700 |
| C | -1.153559817000 | -0.810694666794 | -1.994170220874 |
| H | -2.436254701116 | 4.731955009639  | 0.191324107767  |
| H | -3.283676503626 | 2.555827476649  | 0.836974900376  |
| C | -2.124979012718 | -0.923957100728 | -0.957173083894 |
| C | -3.398998999916 | 0.002176984520  | 0.904662407609  |
| C | -0.806190944076 | -1.953418883422 | -2.767337304655 |
| C | -2.722114365253 | -2.190262541670 | -0.725198183716 |

|   |                 |                 |                 |
|---|-----------------|-----------------|-----------------|
| H | -3.126827276926 | -0.906029141694 | 1.451876409908  |
| H | -3.302474571657 | 0.831523187183  | 1.605449829997  |
| H | -4.433972698529 | -0.067920463043 | 0.540856206650  |
| C | -1.404702717992 | -3.163299784772 | -2.535271158319 |
| H | -0.055221718302 | -1.834718489709 | -3.551153170149 |
| C | -2.366450477862 | -3.270821299149 | -1.500755910822 |
| H | -3.479118984454 | -2.318591341093 | 0.043854325091  |
| H | -1.146746648807 | -4.037961359328 | -3.132672063687 |
| H | -2.848684205987 | -4.232131759310 | -1.315413906036 |
| H | 0.121971186709  | 0.557620920436  | -3.074434301656 |

In Acetonitrile

DAD = 3.2Å

TRS2:product state, electronic energy = -1284.60670490

|   |                 |                 |                 |
|---|-----------------|-----------------|-----------------|
| C | 4.754948920265  | -0.859816612026 | -0.667896605885 |
| C | 4.875975873815  | -0.711299816357 | 0.735199550546  |
| C | 3.637714168551  | -0.420164045574 | -1.357213046166 |
| H | 5.565900281722  | -1.338511182692 | -1.218295229670 |
| C | 3.885805965975  | -0.112305819725 | 1.495780281854  |
| H | 5.776510886440  | -1.079939187691 | 1.228136643258  |
| C | 2.633563524960  | 0.188400250592  | -0.590477120619 |
| H | 3.538028197880  | -0.540833000736 | -2.436073716953 |
| C | 2.761536809853  | 0.346215360129  | 0.796336520319  |
| H | 3.972242681280  | 0.004004250756  | 2.576220469220  |
| N | 1.417382452563  | 0.731897781668  | -0.930937823165 |
| N | 1.620907041667  | 0.984848562083  | 1.221470531108  |
| C | 0.746104084167  | 1.097611560689  | 0.197927849679  |
| C | 0.948709778877  | 0.862166061150  | -2.301860516462 |
| C | 1.351168053935  | 1.363076088211  | 2.601184925360  |
| H | -0.964266957042 | -0.020450321663 | 1.146680401255  |
| C | -0.052201327792 | 2.352855460859  | -0.031520565150 |
| H | -0.135866534253 | 1.001931840587  | -2.308340077509 |
| H | 1.438800611867  | 1.726064680729  | -2.772059147246 |
| H | 1.204171523404  | -0.054307440838 | -2.848543274875 |
| H | 2.147315830528  | 2.033320073694  | 2.949030898003  |
| H | 0.386001724972  | 1.878980453526  | 2.644430550202  |
| H | 1.323686492318  | 0.463586608922  | 3.230446505878  |
| C | -1.400825377237 | 2.322650076924  | -0.395080522079 |
| C | 0.629007358769  | 3.570352279934  | 0.078344548542  |
| C | -2.067471564556 | 3.515794573424  | -0.674082701845 |
| H | -1.919339543531 | 1.363261540265  | -0.469861805220 |
| C | -0.046648926987 | 4.757094146770  | -0.198222798085 |
| H | 1.681821964348  | 3.586375841182  | 0.369118335256  |
| C | -1.391022116994 | 4.731368850017  | -0.575260230474 |
| H | -3.118742742159 | 3.492648840129  | -0.964181002480 |
| H | 0.482579608759  | 5.707881092882  | -0.118306766812 |
| H | -1.912984460664 | 5.665141889068  | -0.790797650141 |
| H | 1.139183645635  | -2.298908125594 | 2.363543223147  |
| C | 0.935299487446  | -2.396315455501 | 1.294261779472  |
| C | -0.226747207394 | -1.827362821646 | 0.780963635942  |
| C | 1.837598561866  | -3.067723457352 | 0.463071330233  |
| C | -0.522103124045 | -1.945914239628 | -0.595721781509 |
| C | -1.191929906672 | -1.028686917942 | 1.598950081952  |
| C | 1.546550561132  | -3.184804264031 | -0.892727388872 |
| H | 2.752775393393  | -3.495623135971 | 0.875562919243  |
| C | 0.373208950079  | -2.640001402180 | -1.422556246838 |
| N | -1.690812275903 | -1.339109357919 | -1.090942933566 |
| C | -2.616182990695 | -1.086177868117 | 1.137632789746  |
| H | 2.231510653502  | -3.713799146759 | -1.558306586842 |
| H | 0.159999527883  | -2.771477669716 | -2.482391985206 |
| C | -2.816979703433 | -1.231733725204 | -0.251663579940 |

|   |                 |                 |                 |
|---|-----------------|-----------------|-----------------|
| C | -1.916321367107 | -1.323866819802 | -2.523741666399 |
| C | -3.709893989502 | -0.956601278350 | 1.987838563407  |
| C | -4.126233327452 | -1.233782176036 | -0.753196319443 |
| H | -2.605409175626 | -0.507035282753 | -2.772457536446 |
| H | -0.971959516170 | -1.135018866501 | -3.044017827963 |
| H | -2.341310916041 | -2.272648929154 | -2.896074052159 |
| C | -5.013492893421 | -0.934437223637 | 1.482738751420  |
| H | -3.532009727388 | -0.856225071978 | 3.060780133009  |
| C | -5.211724434963 | -1.075429845533 | 0.112629179862  |
| H | -4.312782757914 | -1.363442308104 | -1.817892008384 |
| H | -5.862155994146 | -0.814196379364 | 2.157559450847  |
| H | -6.222273196661 | -1.072792624899 | -0.299953303990 |
| H | -0.977779562104 | -0.656341343216 | 2.608907969629  |

TRS2:reactant state, electronic energy = -1284.60670389

|   |                 |                 |                 |
|---|-----------------|-----------------|-----------------|
| C | 3.842398725826  | -2.292646299695 | -1.247097693345 |
| C | 4.451555685851  | -2.007376694440 | -0.032369022042 |
| C | 2.626565462026  | -1.672910294390 | -1.613160363079 |
| H | 4.308077443149  | -2.998448269903 | -1.937018736200 |
| C | 3.880086196734  | -1.084948488081 | 0.872765691025  |
| H | 5.394882734166  | -2.490511331688 | 0.228367151809  |
| C | 2.056884861835  | -0.782993179731 | -0.718964719717 |
| H | 2.149086342725  | -1.891768049194 | -2.569662007525 |
| C | 2.684923843874  | -0.481346139825 | 0.516786945500  |
| H | 4.369788777964  | -0.848527699703 | 1.818515998884  |
| N | 0.866782476599  | -0.074633376979 | -0.768782974747 |
| N | 1.878313640505  | 0.414939595020  | 1.188173363714  |
| C | 0.861173939816  | 0.924816288558  | 0.283075824223  |
| C | 0.115120302322  | 0.126408333194  | -1.980179222035 |
| C | 2.274386081461  | 1.139224843446  | 2.365134212724  |
| H | -0.125469368399 | 0.900000463734  | 0.794015143834  |
| C | 1.043259068098  | 2.385786445466  | -0.110435417304 |
| H | -0.864633459192 | 0.560500800028  | -1.731034089046 |
| H | 0.625015783203  | 0.799495029945  | -2.693571849491 |
| H | -0.053701281367 | -0.843346518266 | -2.471868736892 |
| H | 2.994289589458  | 1.949837345501  | 2.149719839057  |
| H | 1.384424906421  | 1.580465787201  | 2.836208318128  |
| H | 2.733028746118  | 0.446160210209  | 3.084853996278  |
| C | 0.030271008045  | 3.308868140756  | 0.149903006221  |
| C | 2.226449880876  | 2.813995964550  | -0.727273639102 |
| C | 0.192877756621  | 4.652238877988  | -0.198142991085 |
| H | -0.891821377996 | 2.972167935699  | 0.632202595072  |
| C | 2.390371104606  | 4.153014769224  | -1.075253263884 |
| H | 3.023610930331  | 2.093310351740  | -0.931321225518 |
| C | 1.372030049071  | 5.074135188803  | -0.810309980813 |
| H | -0.603285872818 | 5.369022858279  | 0.010373127899  |
| H | 3.314032165335  | 4.482955092419  | -1.554109910419 |
| H | 1.501589485493  | 6.123369931482  | -1.081854705763 |
| H | 0.334914100735  | -1.529771149072 | 2.854770295476  |
| C | 0.081962003346  | -2.010602162969 | 1.908368063706  |
| C | -1.028688629250 | -1.493361719367 | 1.174868007340  |
| C | 0.790322759337  | -3.078752372763 | 1.433751493798  |
| C | -1.390119008143 | -2.076795977096 | -0.084675335591 |
| C | -1.730245201473 | -0.381125090312 | 1.631816537300  |
| C | 0.413001843298  | -3.664359375966 | 0.196815852517  |
| H | 1.635211097661  | -3.484091484840 | 1.991083083997  |
| C | -0.641946987596 | -3.192145713175 | -0.548006828956 |
| N | -2.445044464352 | -1.558942416156 | -0.783961947824 |
| C | -2.899072451347 | 0.038182789364  | 0.978548657818  |
| H | 0.970605178257  | -4.525586203049 | -0.175968261816 |
| H | -0.898653061125 | -3.703858301438 | -1.471177891956 |
| C | -3.249149128473 | -0.574655106071 | -0.260293597448 |

|   |                 |                 |                 |
|---|-----------------|-----------------|-----------------|
| C | -2.761793377140 | -2.061079585269 | -2.126630140913 |
| C | -3.719657399615 | 1.070720491798  | 1.515399158116  |
| C | -4.438042645101 | -0.158401244136 | -0.914172301576 |
| H | -3.047384153408 | -1.217116981979 | -2.761279069959 |
| H | -1.879651995341 | -2.523628074745 | -2.569464228498 |
| H | -3.583520859805 | -2.788373753321 | -2.077568013110 |
| C | -4.857749179418 | 1.463645803128  | 0.861964313389  |
| H | -3.416089443230 | 1.528500487098  | 2.458547855850  |
| C | -5.213120695225 | 0.832904553680  | -0.356199880434 |
| H | -4.761666475438 | -0.627027449856 | -1.840098737387 |
| H | -5.492815820151 | 2.248746252293  | 1.272846624939  |
| H | -6.129243392036 | 1.133413826687  | -0.867226925210 |
| H | -1.514190243730 | -0.007345953815 | 2.636798550074  |

TRS8:product state, electronic energy = -1284.61122824

|   |                 |                 |                 |
|---|-----------------|-----------------|-----------------|
| C | 2.247845464810  | -3.309646789782 | -1.609803363433 |
| C | 1.987787961782  | -2.662444832836 | -2.842581012839 |
| C | 1.532408441424  | -3.014324375638 | -0.460965843647 |
| H | 3.034980507044  | -4.063716716864 | -1.567389710704 |
| C | 1.007853045368  | -1.692313895023 | -2.967543624678 |
| H | 2.580635694176  | -2.936287508480 | -3.716244526261 |
| C | 0.525758189563  | -2.046560328153 | -0.589634757787 |
| H | 1.728367540277  | -3.511502360944 | 0.489213980312  |
| C | 0.276700489570  | -1.398216090830 | -1.808121692916 |
| H | 0.809520759097  | -1.183826437018 | -3.911253778901 |
| N | -0.386980812089 | -1.550580703312 | 0.308009328512  |
| N | -0.770271263690 | -0.536627859873 | -1.584128890382 |
| C | -1.101307461911 | -0.543683638547 | -0.272249226179 |
| C | -0.460490080788 | -1.969996882092 | 1.701082221267  |
| C | -1.390759570647 | 0.291041534145  | -2.608006216980 |
| H | -0.689702458615 | 0.970290713244  | 1.243155147105  |
| C | -2.547903990667 | -0.558596068384 | 0.154846120248  |
| H | -1.104553859010 | -1.275590938290 | 2.250807802423  |
| H | -0.872888371109 | -2.986433008206 | 1.756783205284  |
| H | 0.551702319570  | -1.952323508238 | 2.128452349279  |
| H | -2.266846058222 | 0.789413642537  | -2.179467487857 |
| H | -0.671354550500 | 1.043344659583  | -2.958594559858 |
| H | -1.697465684304 | -0.350409105829 | -3.443487106659 |
| C | -3.254837457162 | 0.609157351488  | 0.456960926171  |
| C | -3.197491138156 | -1.799493396671 | 0.170893004543  |
| C | -4.606824336875 | 0.537611848930  | 0.792544153735  |
| H | -2.745046487531 | 1.574825097620  | 0.427353311197  |
| C | -4.547667779524 | -1.862121715402 | 0.506509680199  |
| H | -2.652197845120 | -2.710355169781 | -0.084672392753 |
| C | -5.251978194392 | -0.698044621864 | 0.820694394645  |
| H | -5.154630869574 | 1.450147592088  | 1.031604011217  |
| H | -5.052555326280 | -2.829210831179 | 0.518976465407  |
| H | -6.309223384867 | -0.756665634814 | 1.084527910137  |
| H | -1.351273662629 | 3.983949712146  | 0.639890179635  |
| C | -0.586166321520 | 3.618286044713  | -0.049011395092 |
| C | 0.184396583571  | 2.524328158064  | 0.336914359885  |
| C | -0.397799850190 | 4.240058287901  | -1.286106810388 |
| C | 1.192491685550  | 2.030637497108  | -0.522315258800 |
| C | -0.047083969152 | 1.806349897909  | 1.626678301358  |
| C | 0.612005114620  | 3.774630007834  | -2.121719047636 |
| H | -1.019944130822 | 5.086860840582  | -1.578580953666 |
| C | 1.409983040335  | 2.692650977467  | -1.742470223040 |
| N | 1.935310455994  | 0.895054284764  | -0.152608661218 |
| C | 1.091801109183  | 0.978994651809  | 2.133590438326  |
| H | 0.801249432135  | 4.259199457869  | -3.081341051346 |
| H | 2.209131183206  | 2.378572306564  | -2.410303346633 |
| C | 2.041612629215  | 0.515606728502  | 1.196602818789  |



|   |                 |                 |                 |
|---|-----------------|-----------------|-----------------|
| C | 2.920079528159  | 0.378977554333  | -1.084513053424 |
| C | 1.190743259507  | 0.603070175465  | 3.470282165427  |
| C | 3.063987904931  | -0.337540131096 | 1.645508665914  |
| H | 3.081314851314  | -0.689310647271 | -0.899521181146 |
| H | 2.547411874739  | 0.473804766107  | -2.108307674671 |
| H | 3.887462166111  | 0.906289732161  | -1.005287815872 |
| C | 2.192299088880  | -0.267237955038 | 3.906585619477  |
| H | 0.451221762696  | 0.989264533402  | 4.175711824274  |
| C | 3.123575693911  | -0.734204236226 | 2.983823593515  |
| H | 3.830271586198  | -0.696270674997 | 0.961305348440  |
| H | 2.245632412544  | -0.567139966001 | 4.953984828625  |
| H | 3.924757763891  | -1.404614256139 | 3.300342514003  |
| H | -0.813448144027 | 2.112122770485  | 2.351133295421  |

TRS8:reactant state, electronic energy = -1284.61122491

|   |                 |                 |                 |
|---|-----------------|-----------------|-----------------|
| C | -0.365057142244 | -2.502837041937 | 3.075335702270  |
| C | -0.634839855991 | -1.243519491105 | 3.593765676442  |
| C | 0.203584157601  | -2.654774660887 | 1.789287838751  |
| H | -0.579135425278 | -3.392776505330 | 3.669681815769  |
| C | -0.353826259098 | -0.073898768129 | 2.851855274690  |
| H | -1.061097043338 | -1.148015637031 | 4.594031163311  |
| C | 0.469942617059  | -1.510047301302 | 1.058511433715  |
| H | 0.434831611967  | -3.643620948722 | 1.390034928277  |
| C | 0.189035634038  | -0.224037697515 | 1.586504596274  |
| H | -0.548485901456 | 0.916659755856  | 3.266583199377  |
| N | 0.998192931222  | -1.339742706269 | -0.215653108582 |
| N | 0.543755729764  | 0.710915837200  | 0.628854996848  |
| C | 1.383995352794  | 0.054338966478  | -0.371179904617 |
| C | 1.747787930365  | -2.381690513020 | -0.872901826183 |
| C | 0.716571530173  | 2.106922426438  | 0.934229568766  |
| H | 1.073034271356  | 0.399974714626  | -1.377997328718 |
| C | 2.858765555528  | 0.424406368115  | -0.277384254054 |
| H | 2.002805210126  | -2.058547458966 | -1.891533124551 |
| H | 2.681300132285  | -2.636539413602 | -0.337673681051 |
| H | 1.129310235730  | -3.288019128540 | -0.949041361180 |
| H | 0.899780645589  | 2.660716054764  | 0.002556785967  |
| H | -0.206268814009 | 2.500631460115  | 1.387970498978  |
| H | 1.559402456761  | 2.293050501087  | 1.625672101331  |
| C | 3.451512626455  | 1.185245718994  | -1.285405149649 |
| C | 3.621925316485  | 0.039769465549  | 0.834036985671  |
| C | 4.792194797306  | 1.566260186915  | -1.187943203949 |
| H | 2.857082241817  | 1.482859753369  | -2.153601721423 |
| C | 4.959813882911  | 0.416318479009  | 0.931882899754  |
| H | 3.163819762531  | -0.558450922938 | 1.626860155641  |
| C | 5.546374122497  | 1.182088656401  | -0.080243912212 |
| H | 5.247477619728  | 2.162741411640  | -1.980519580077 |
| H | 5.549476487675  | 0.113406560766  | 1.798987087611  |
| H | 6.594320478423  | 1.477542078358  | -0.003151488585 |
| H | -1.269710041624 | 3.671798685988  | -1.985825899041 |
| C | -1.803527856191 | 3.212546075792  | -1.152033904865 |
| C | -1.831056408611 | 1.788282757479  | -1.081971755372 |
| C | -2.431815018501 | 3.968030449310  | -0.201213223826 |
| C | -2.505448695233 | 1.137826388451  | 0.000402644194  |
| C | -1.173034326974 | 1.011586266678  | -2.040097624418 |
| C | -3.107009531953 | 3.318607645121  | 0.864236809842  |
| H | -2.419886735094 | 5.056813938929  | -0.254092875764 |
| C | -3.148698945090 | 1.948614249795  | 0.975870834146  |
| N | -2.532119588591 | -0.231014807745 | 0.045840100456  |
| C | -1.346425865752 | -0.370457220916 | -2.059366954375 |
| H | -3.618136404405 | 3.919690045859  | 1.618063892574  |
| H | -3.705151380460 | 1.513251204210  | 1.800613416663  |
| C | -2.018912634728 | -0.995142365016 | -0.965181344692 |

|   |                 |                 |                 |
|---|-----------------|-----------------|-----------------|
| C | -3.143101395898 | -0.931610457439 | 1.183586421067  |
| C | -0.807353803021 | -1.169363757601 | -3.112674941488 |
| C | -2.161657428394 | -2.411106300563 | -0.973232984238 |
| H | -2.486941597916 | -1.755606503843 | 1.483059922245  |
| H | -3.232736373199 | -0.261448052659 | 2.036744821926  |
| H | -4.131607612866 | -1.315236053332 | 0.897219535001  |
| C | -0.952722886679 | -2.527472844214 | -3.094951966709 |
| H | -0.283385600495 | -0.659786814590 | -3.923348228239 |
| C | -1.640780781172 | -3.141175318591 | -2.012902256242 |
| H | -2.692118947272 | -2.926918897725 | -0.177342175351 |
| H | -0.547559920886 | -3.143432478938 | -3.898190004920 |
| H | -1.765215568726 | -4.225404055112 | -2.007042162605 |
| H | -0.811594547043 | 1.520488020285  | -2.938694160584 |

In Chloroform

DAD = 3.2Å

TRS2:product state, electronic energy = -1284.59524385

|   |                 |                 |                  |
|---|-----------------|-----------------|------------------|
| C | 4.779827069492  | -0.944814762548 | -0.589297350625  |
| C | 4.883716795720  | -0.794314836837 | 0.814592925983   |
| C | 3.678258943163  | -0.492225759426 | -1.294441425908  |
| H | 5.591639298017  | -1.435880793726 | -1.127046414380  |
| C | 3.892125252567  | -0.178969595715 | 1.559580873223   |
| H | 5.772426610497  | -1.173441344449 | 1.320551450147   |
| C | 2.673043269867  | 0.133046245476  | -0.543916907707  |
| H | 3.593437582590  | -0.615571321831 | -2.374258824863  |
| C | 2.784911427976  | 0.294420174109  | 0.843597945957   |
| H | 3.967660283566  | -0.059430086959 | 2.640504844145   |
| N | 1.4697374436023 | 0.694053114387  | -0.902060504257  |
| N | 1.648427443632  | 0.953827004668  | 1.250142522883   |
| C | 0.787557406428  | 1.075096134985  | 0.215007837850   |
| C | 1.015538552617  | 0.823396319093  | -2.277215104400  |
| C | 1.362924393171  | 1.342259545777  | 2.623190176224   |
| H | -0.959912059951 | -0.017795218276 | 1.143500569850   |
| C | 0.012712766859  | 2.342005446392  | -0.035011298945  |
| H | -0.070414913342 | 0.953069305765  | -2.292348444796  |
| H | 1.499093594040  | 1.693562207007  | -2.7430444232645 |
| H | 1.282942011464  | -0.089957535562 | -2.822959825218  |
| H | 2.166022808181  | 1.996884801391  | 2.985460821454   |
| H | 0.410606216529  | 1.883268939563  | 2.648456833114   |
| H | 1.303641684149  | 0.448515107419  | 3.258774883234   |
| C | -1.341298081432 | 2.332215564704  | -0.378469642370  |
| C | 0.721715891881  | 3.546994811247  | 0.032234313712   |
| C | -1.986049115774 | 3.532309746585  | -0.678447959489  |
| H | -1.884010096242 | 1.384232314489  | -0.418703421770  |
| C | 0.067955139817  | 4.740297701987  | -0.265685593735  |
| H | 1.779220167153  | 3.549224479748  | 0.306193894556   |
| C | -1.282105325073 | 4.734186615534  | -0.622170202234  |
| H | -3.042339892354 | 3.524998119294  | -0.950042562006  |
| H | 0.618225048572  | 5.681169204442  | -0.219165749825  |
| H | -1.787066691599 | 5.673218045421  | -0.853939493092  |
| H | 1.124008123937  | -2.379775452493 | 2.248913095893   |
| C | 0.894792596329  | -2.433655729122 | 1.181684546580   |
| C | -0.268258365794 | -1.828384737365 | 0.714892741806   |
| C | 1.763489545631  | -3.095778980209 | 0.309699548136   |
| C | -0.601315231164 | -1.903546031901 | -0.655627675138  |
| C | -1.197530870050 | -1.033035336618 | 1.577056802026   |
| C | 1.435509757973  | -3.170457960536 | -1.040056341072  |
| H | 2.679370209810  | -3.553464778551 | 0.686311540291   |
| C | 0.258486000157  | -2.592026483685 | -1.523196458353  |
| N | -1.769424850174 | -1.257390561619 | -1.103577610260  |
| C | -2.634883287477 | -1.054860319737 | 1.154156205645   |

|   |                 |                 |                 |
|---|-----------------|-----------------|-----------------|
| H | 2.091356383150  | -3.697596573169 | -1.735502322667 |
| H | 0.010818810337  | -2.699586996328 | -2.578232466170 |
| C | -2.875165479040 | -1.161153562233 | -0.231155611209 |
| C | -2.034722794114 | -1.212637798283 | -2.528265265158 |
| C | -3.702864755689 | -0.935893465109 | 2.037552120602  |
| C | -4.196677369456 | -1.136889298517 | -0.696236004836 |
| H | -2.722742921268 | -0.385342747600 | -2.743936695617 |
| H | -1.102998684360 | -1.023110107604 | -3.071505403955 |
| H | -2.478500196708 | -2.149638331783 | -2.908700361734 |
| C | -5.018263360584 | -0.885984620256 | 1.569406282469  |
| H | -3.496374652911 | -0.870445501287 | 3.107947416903  |
| C | -5.255654035501 | -0.989489086759 | 0.202719837795  |
| H | -4.415606206264 | -1.242420338415 | -1.757219048762 |
| H | -5.846859770730 | -0.776836148581 | 2.270172580472  |
| H | -6.277167178295 | -0.968191325447 | -0.180595084814 |
| H | -0.954990335954 | -0.695476420943 | 2.592799697061  |

TRS2:reactant state, electronic energy = -1284.59524108

|   |                 |                 |                 |
|---|-----------------|-----------------|-----------------|
| C | 3.899483112352  | -2.246584503791 | -1.196779804417 |
| C | 4.495326139011  | -1.940243537922 | 0.019805438031  |
| C | 2.672142929884  | -1.660459185655 | -1.570760420688 |
| H | 4.388242656201  | -2.941123871607 | -1.881631695577 |
| C | 3.898201172249  | -1.028884040556 | 0.915983302852  |
| H | 5.450250775770  | -2.396492831574 | 0.285342291415  |
| C | 2.077504021495  | -0.778934009402 | -0.684328190581 |
| H | 2.210387014970  | -1.891614519994 | -2.531891650489 |
| C | 2.690937725384  | -0.456526327128 | 0.550343593194  |
| H | 4.380285274755  | -0.772754062646 | 1.860255622294  |
| N | 0.871744769605  | -0.092117629937 | -0.747582775724 |
| N | 1.861462316128  | 0.429196001910  | 1.214176834432  |
| C | 0.845672378017  | 0.916617800462  | 0.295393099164  |
| C | 0.146294694280  | 0.108570897717  | -1.975130390476 |
| C | 2.265151386996  | 1.197862732431  | 2.361181252753  |
| H | -0.146033479078 | 0.883344539057  | 0.800510840191  |
| C | 1.012443644819  | 2.373742903171  | -0.117208198268 |
| H | -0.841849965447 | 0.536336833808  | -1.748140545772 |
| H | 0.665908382516  | 0.787932048272  | -2.674776400257 |
| H | -0.006070445263 | -0.860964818315 | -2.473253366195 |
| H | 2.965179662663  | 2.014202335636  | 2.107659020896  |
| H | 1.377480550692  | 1.639620765797  | 2.836391185498  |
| H | 2.748789094794  | 0.535860051181  | 3.093438555536  |
| C | 0.001355550884  | 3.296042919808  | 0.150983409641  |
| C | 2.183295141900  | 2.799486064982  | -0.758495022320 |
| C | 0.152555244766  | 4.636163302514  | -0.212518838178 |
| H | -0.911826360534 | 2.963251769760  | 0.652716673804  |
| C | 2.335439608491  | 4.135119521424  | -1.122262728077 |
| H | 2.979663001771  | 2.079916008641  | -0.969114053094 |
| C | 1.319024818170  | 5.055259466266  | -0.848929640973 |
| H | -0.642051100389 | 5.352455583180  | 0.002745331436  |
| H | 3.249280263977  | 4.463326736228  | -1.620363764724 |
| H | 1.440352734888  | 6.101954717076  | -1.133048020776 |
| H | 0.348560382425  | -1.539979778773 | 2.838360588966  |
| C | 0.104391724587  | -2.004112173796 | 1.881995706570  |
| C | -1.019960803206 | -1.498973402952 | 1.161020887959  |
| C | 0.842315304854  | -3.039896621802 | 1.382471246236  |
| C | -1.368320039649 | -2.066850563004 | -0.110301177950 |
| C | -1.742142455631 | -0.407828026719 | 1.632975031180  |
| C | 0.475913132697  | -3.611304377172 | 0.136566381587  |
| H | 1.702748932763  | -3.430170774386 | 1.925904393709  |
| C | -0.597959483567 | -3.156535937897 | -0.592630227829 |
| N | -2.431683057883 | -1.554922693903 | -0.802400842842 |
| C | -2.923085695696 | -0.000905812118 | 0.988858594994  |

|   |                 |                 |                 |
|---|-----------------|-----------------|-----------------|
| H | 1.056614269808  | -4.448736301911 | -0.254093573364 |
| H | -0.848986060392 | -3.662677637063 | -1.520359912234 |
| C | -3.258410303623 | -0.595273146928 | -0.262390452148 |
| C | -2.737182386111 | -2.044086204667 | -2.150868675660 |
| C | -3.769217391244 | 0.998242248103  | 1.546287247327  |
| C | -4.453317190949 | -0.190890314792 | -0.910185143997 |
| H | -3.050962529698 | -1.201318391132 | -2.773718176638 |
| H | -1.842533165115 | -2.472307690600 | -2.604039230540 |
| H | -3.534639109106 | -2.799484163934 | -2.115349211200 |
| C | -4.915471641551 | 1.379798817451  | 0.899065753303  |
| H | -3.483375801595 | 1.442801438513  | 2.501400066802  |
| C | -5.252810962365 | 0.770894280424  | -0.333560491276 |
| H | -4.765437729606 | -0.647298653093 | -1.846166052163 |
| H | -5.570073595978 | 2.138734134586  | 1.327681424348  |
| H | -6.173918110573 | 1.061937389426  | -0.840854773370 |
| H | -1.535087950310 | -0.049106302655 | 2.645320673677  |

TRS8:product state, electronic energy = -1284.60103861

|   |                 |                 |                 |
|---|-----------------|-----------------|-----------------|
| C | 2.229524392924  | -3.302142726141 | -1.656274361286 |
| C | 1.976705443248  | -2.633009884604 | -2.878002632420 |
| C | 1.512252656168  | -3.021578128306 | -0.504859782148 |
| H | 3.012249537322  | -4.061208864833 | -1.624517695055 |
| C | 1.001609625648  | -1.656156852722 | -2.988834266555 |
| H | 2.570108651216  | -2.895521244467 | -3.754640623925 |
| C | 0.510181611345  | -2.048060446112 | -0.619773560439 |
| H | 1.705690559080  | -3.534870314964 | 0.437165458313  |
| C | 0.266861370227  | -1.378788720688 | -1.827944472566 |
| H | 0.809665856962  | -1.132763664708 | -3.925804086301 |
| N | -0.404266397153 | -1.564538268740 | 0.283974307129  |
| N | -0.781250149315 | -0.519981255805 | -1.593345146768 |
| C | -1.113014193695 | -0.544580049242 | -0.281192093037 |
| C | -0.463926598492 | -1.991483649613 | 1.675812579381  |
| C | -1.392206402306 | 0.332506698111  | -2.602860359989 |
| H | -0.683271790396 | 0.957084639051  | 1.227753382765  |
| C | -2.557751164658 | -0.545059678416 | 0.147047994267  |
| H | -1.138560041387 | -1.328471921554 | 2.227000558882  |
| H | -0.837189785029 | -3.023244335525 | 1.728573187610  |
| H | 0.544517847272  | -1.933992426842 | 2.109122034084  |
| H | -2.330636369001 | 0.736402563798  | -2.207776721127 |
| H | -0.712355919670 | 1.158094381482  | -2.855523184147 |
| H | -1.599998169276 | -0.271328930212 | -3.494720666329 |
| C | -3.252403693262 | 0.636556683655  | 0.425556180433  |
| C | -3.222440499339 | -1.777339706650 | 0.184077428955  |
| C | -4.606071464300 | 0.587721746042  | 0.756412852557  |
| H | -2.730540847802 | 1.595670100990  | 0.380478545802  |
| C | -4.574364216464 | -1.817140677197 | 0.515202026492  |
| H | -2.689684904335 | -2.700137891320 | -0.053836424655 |
| C | -5.265657374516 | -0.639397014513 | 0.804475675764  |
| H | -5.144603283047 | 1.510407531055  | 0.976264015190  |
| H | -5.091912461491 | -2.777024205205 | 0.542961820879  |
| H | -6.324567349630 | -0.680582840178 | 1.064088369496  |
| H | -1.314389575289 | 3.987876778584  | 0.614738732717  |
| C | -0.546191535914 | 3.608621493678  | -0.063309914862 |
| C | 0.206981082962  | 2.507828439526  | 0.336155155332  |
| C | -0.331113776006 | 4.227994543631  | -1.296815894875 |
| C | 1.225266088881  | 2.005018288532  | -0.504997372768 |
| C | -0.047721588196 | 1.794805202152  | 1.624692241606  |
| C | 0.690244229651  | 3.754995991455  | -2.113122797468 |
| H | -0.936883186794 | 5.083238481082  | -1.598118702242 |
| C | 1.471402064212  | 2.666048221624  | -1.719582345546 |
| N | 1.949733618561  | 0.861052207690  | -0.122298033629 |
| C | 1.076664620937  | 0.960354466120  | 2.152505519173  |

|   |                 |                 |                 |
|---|-----------------|-----------------|-----------------|
| H | 0.904655819951  | 4.242786537898  | -3.065619252381 |
| H | 2.286114830510  | 2.351447089032  | -2.367927782435 |
| C | 2.035929224578  | 0.487210354655  | 1.231037390523  |
| C | 2.951725613028  | 0.341918615522  | -1.032986120126 |
| C | 1.153699572906  | 0.588300270579  | 3.491449631117  |
| C | 3.046972455453  | -0.369173621891 | 1.697418030270  |
| H | 3.095567322132  | -0.730355078116 | -0.855156194074 |
| H | 2.606351662730  | 0.449808061188  | -2.064995722062 |
| H | 3.922782292281  | 0.857377716387  | -0.925986889391 |
| C | 2.142257484868  | -0.287585783190 | 3.944323737428  |
| H | 0.411199850289  | 0.985549580912  | 4.187460900409  |
| C | 3.084723707249  | -0.761922772295 | 3.037392063799  |
| H | 3.824871559434  | -0.729147662388 | 1.027408116515  |
| H | 2.180945866690  | -0.581380146208 | 4.993870327301  |
| H | 3.879758073589  | -1.431782539733 | 3.369654916269  |
| H | -0.829288695540 | 2.100776137947  | 2.332609348149  |

TRS8:reactant state, electronic energy = -1284.60102826

|   |                 |                 |                 |
|---|-----------------|-----------------|-----------------|
| C | -0.399154820335 | -2.466940602736 | 3.101518517733  |
| C | -0.647623930730 | -1.202397000821 | 3.618240022340  |
| C | 0.159198462910  | -2.630028499313 | 1.813564531283  |
| H | -0.617490008928 | -3.351329076198 | 3.702098246115  |
| C | -0.354259292596 | -0.039746532574 | 2.872210429178  |
| H | -1.060239037891 | -1.098992160706 | 4.623189537571  |
| C | 0.437174522271  | -1.491094761021 | 1.078279755516  |
| H | 0.379311870758  | -3.622958425224 | 1.418573691744  |
| C | 0.178154361012  | -0.200973424453 | 1.603807624896  |
| H | -0.523701809446 | 0.954302944671  | 3.289541621642  |
| N | 0.963806353761  | -1.332423938686 | -0.199920209563 |
| N | 0.543450724091  | 0.727929300821  | 0.641904227547  |
| C | 1.372227962236  | 0.055163323310  | -0.356666734813 |
| C | 1.707407679025  | -2.386122417869 | -0.845959280721 |
| C | 0.747971997331  | 2.119344824787  | 0.951091519567  |
| H | 1.058240714909  | 0.402357038582  | -1.364329245920 |
| C | 2.851992580412  | 0.405473376906  | -0.277780463358 |
| H | 1.984950495847  | -2.067503326346 | -1.860101920060 |
| H | 2.628533604681  | -2.655271465394 | -0.297372896438 |
| H | 1.075471826873  | -3.282015703180 | -0.934043727822 |
| H | 0.949064671447  | 2.671909141477  | 0.022401184341  |
| H | -0.168014781052 | 2.534310525729  | 1.400041427334  |
| H | 1.592316581689  | 2.285537011535  | 1.644920076552  |
| C | 3.457250793292  | 1.119771117535  | -1.311588874605 |
| C | 3.609950492568  | 0.044041927290  | 0.844728330653  |
| C | 4.805397365993  | 1.475915007991  | -1.231164287800 |
| H | 2.868384791734  | 1.400893080818  | -2.189311951228 |
| C | 4.954898524759  | 0.396382148027  | 0.925949519278  |
| H | 3.141782034950  | -0.515623951209 | 1.659452901488  |
| C | 5.554127563767  | 1.113940355596  | -0.113165295437 |
| H | 5.270908265584  | 2.034954404516  | -2.044585588308 |
| H | 5.540635953488  | 0.111937198730  | 1.801713130418  |
| H | 6.608132023453  | 1.389578902884  | -0.048832601510 |
| H | -1.230482855620 | 3.655490592130  | -2.041527261640 |
| C | -1.759799565216 | 3.209268763284  | -1.197804826630 |
| C | -1.802339671673 | 1.786486797199  | -1.110468611038 |
| C | -2.371367428199 | 3.984076006458  | -0.251941917346 |
| C | -2.476171496415 | 1.157062010919  | -0.015357690543 |
| C | -1.165962752053 | 0.989610854012  | -2.066762467889 |
| C | -3.045454473146 | 3.355885805871  | 0.826220781179  |
| H | -2.348003990497 | 5.071683096781  | -0.319748566874 |
| C | -3.101346240088 | 1.987883962392  | 0.954491612558  |
| N | -2.520883817789 | -0.211223952134 | 0.045955907961  |
| C | -1.351000436126 | -0.390743696994 | -2.065992682555 |

|   |                 |                 |                 |
|---|-----------------|-----------------|-----------------|
| H | -3.544027634081 | 3.972131319815  | 1.576110444871  |
| H | -3.657421783156 | 1.569911253986  | 1.788305450878  |
| C | -2.021962107333 | -0.993910478735 | -0.958559601428 |
| C | -3.133730636788 | -0.889762693565 | 1.196284287619  |
| C | -0.828043502240 | -1.209424992153 | -3.112241401913 |
| C | -2.180634400647 | -2.407878286092 | -0.948978922155 |
| H | -2.489892802809 | -1.721821154999 | 1.500098268916  |
| H | -3.197297624461 | -0.212006653783 | 2.045836611595  |
| H | -4.134041653025 | -1.255100525932 | 0.926207269940  |
| C | -0.987856569346 | -2.565165323682 | -3.076571984977 |
| H | -0.306597393156 | -0.718123667547 | -3.935925955681 |
| C | -1.675933003403 | -3.156993612025 | -1.982637728476 |
| H | -2.710612610875 | -2.907953910114 | -0.143050671975 |
| H | -0.596771621875 | -3.195230892206 | -3.875720296639 |
| H | -1.814877402668 | -4.239266592620 | -1.963168109328 |
| H | -0.803434065177 | 1.483249624260  | -2.973442156042 |

### The atom coordinates and electronic energies of the ground state reactants in gas-phase

MA<sup>+</sup>

|   |                 |                 |                 |
|---|-----------------|-----------------|-----------------|
| H | 1.007756611487  | -1.402736777642 | 2.642416369485  |
| C | 0.766316550087  | -1.933290074230 | 1.720173286727  |
| C | -0.485017721917 | -1.658710817747 | 1.089968062752  |
| C | 1.629189875149  | -2.845619800777 | 1.181690930331  |
| C | -0.830361515637 | -2.325350234195 | -0.129281547121 |
| C | -1.392574848147 | -0.754336356389 | 1.641455166489  |
| C | 1.263946887929  | -3.528642531299 | -0.007436572835 |
| H | 2.583570029608  | -3.061570292892 | 1.661079560743  |
| C | 0.075077044236  | -3.284482352230 | -0.654257339466 |
| N | -2.020055958650 | -2.029052769733 | -0.745125616297 |
| C | -2.635818040340 | -0.527504779427 | 1.051317222843  |
| H | 1.940868501488  | -4.277903173692 | -0.420693846624 |
| H | -0.163076243396 | -3.858907131227 | -1.545087491776 |
| C | -2.954990145203 | -1.208065198322 | -0.167416207663 |
| C | -2.299812122189 | -2.605941447321 | -2.067519084075 |
| C | -3.588458013153 | 0.357027227515  | 1.641870208491  |
| C | -4.243213535144 | -1.013764839754 | -0.731738114346 |
| H | -2.916534348494 | -1.910754150038 | -2.640612050340 |
| H | -1.361790414580 | -2.729700028114 | -2.612319076658 |
| H | -2.811271369615 | -3.573550041493 | -1.970892713151 |
| C | -4.813468752612 | 0.542431028852  | 1.066015482721  |
| H | -3.313877136683 | 0.870482412738  | 2.564516599405  |
| C | -5.135795829240 | -0.163428080071 | -0.122329745530 |
| H | -4.556265051173 | -1.548779355938 | -1.623940934695 |
| H | -5.545469231476 | 1.213155297115  | 1.515004291527  |
| H | -6.124774699559 | -0.036777955415 | -0.565364405186 |
| H | -1.132515522777 | -0.228523778275 | 2.563697564248  |

DMPBIH

|   |                |                 |                 |
|---|----------------|-----------------|-----------------|
| C | 4.356573245151 | -1.066225821603 | -1.188279990312 |
| C | 4.815652172934 | -0.619384931807 | 0.040283444260  |
| C | 3.004891344824 | -0.903308382716 | -1.561646480711 |
| H | 5.047350354738 | -1.540093805865 | -1.886668142345 |
| C | 3.945304813921 | 0.012037868173  | 0.955046907293  |
| H | 5.866384673371 | -0.742891602423 | 0.305192891273  |
| C | 2.149066160025 | -0.304039377829 | -0.656821659716 |
| H | 2.651097635447 | -1.234880181109 | -2.538324295912 |
| C | 2.617668190810 | 0.152072496406  | 0.597227160872  |

|   |                 |                 |                 |
|---|-----------------|-----------------|-----------------|
| H | 4.313920771057  | 0.383612950234  | 1.911636713523  |
| N | 0.791883160444  | -0.018871160756 | -0.733112419331 |
| N | 1.542340777738  | 0.711592374855  | 1.275255356530  |
| C | 0.438968727766  | 0.905101593516  | 0.339933002586  |
| C | 0.082020296825  | 0.012092875805  | -1.981803688014 |
| C | 1.715443818096  | 1.602037050291  | 2.389370107407  |
| H | -0.519193881134 | 0.603671802007  | 0.807597826951  |
| C | 0.293055393960  | 2.350362073914  | -0.131234617313 |
| H | -0.991745244765 | 0.142979941508  | -1.788135283947 |
| H | 0.414998864777  | 0.829970111408  | -2.648832171621 |
| H | 0.215125681511  | -0.945325633986 | -2.505342772817 |
| H | 2.192392534676  | 2.560113749450  | 2.107711305736  |
| H | 0.735686589028  | 1.824382600070  | 2.834622671025  |
| H | 2.331621729590  | 1.114812665921  | 3.158392387629  |
| C | -0.900701687644 | 3.043036251605  | 0.062674196001  |
| C | 1.364683748219  | 2.993685253839  | -0.765517546214 |
| C | -1.034027661405 | 4.364957252144  | -0.368397796915 |
| H | -1.736988238217 | 2.541647198697  | 0.557428737349  |
| C | 1.233964273011  | 4.310860649959  | -1.195834786289 |
| H | 2.303767563380  | 2.454960641629  | -0.920306836727 |
| C | 0.033576945711  | 4.999085372786  | -0.997833701419 |
| H | -1.973061070068 | 4.898043347437  | -0.211577244496 |
| H | 2.071431862723  | 4.806739071787  | -1.689017326714 |
| H | -0.065767546503 | 6.031565704653  | -1.336308947619 |

### The atom coordinates and electronic energies of the reactant states in solution

In acetonitrile

DMPBIH, electronic energy = -689.943454936

|   |                 |                 |                 |
|---|-----------------|-----------------|-----------------|
| C | 4.358449285183  | -1.087878759340 | -1.181808399498 |
| C | 4.817944764383  | -0.640612109754 | 0.047870290243  |
| C | 3.007322967058  | -0.911853917602 | -1.562324670459 |
| H | 5.046681205531  | -1.572341695943 | -1.876747707603 |
| C | 3.949428329015  | 0.005181334662  | 0.958886083218  |
| H | 5.866930621196  | -0.773921452187 | 0.318361399798  |
| C | 2.152738295012  | -0.298829549902 | -0.662637583706 |
| H | 2.651344079989  | -1.243354183796 | -2.538881602470 |
| C | 2.622835624373  | 0.158759813204  | 0.595407833826  |
| H | 4.316246677344  | 0.377245720927  | 1.916638321343  |
| N | 0.802652386056  | -0.006617950823 | -0.742248551642 |
| N | 1.553501535591  | 0.724260060310  | 1.267114933229  |
| C | 0.443632807137  | 0.916613149517  | 0.333989487396  |
| C | 0.084228108897  | 0.004138277024  | -1.989574435685 |
| C | 1.723404214520  | 1.599701106464  | 2.397074112976  |
| H | -0.512281741316 | 0.617092159215  | 0.800132792568  |
| C | 0.294558112729  | 2.361926202759  | -0.136026812065 |
| H | -0.988864583820 | 0.130803888938  | -1.791153717512 |
| H | 0.413230225239  | 0.814376046646  | -2.667144916115 |
| H | 0.222563098350  | -0.957317283617 | -2.504417999608 |
| H | 2.205149859150  | 2.558589339792  | 2.128218097330  |
| H | 0.742259837365  | 1.815887432065  | 2.841553227635  |
| H | 2.339331683642  | 1.103137471754  | 3.160392814626  |
| C | -0.904515305132 | 3.046700833450  | 0.062794872486  |
| C | 1.360549688788  | 3.014255984630  | -0.771508314910 |
| C | -1.046194451885 | 4.369680399546  | -0.365520206749 |
| H | -1.735818707457 | 2.538139483190  | 0.558317535172  |
| C | 1.221659322076  | 4.332799660003  | -1.199251877588 |
| H | 2.305062016031  | 2.487082969420  | -0.932560248560 |
| C | 0.016612385832  | 5.013177561665  | -0.996602477112 |
| H | -1.988670388699 | 4.896481565400  | -0.205086277602 |
| H | 2.055477942604  | 4.834835201144  | -1.693336921574 |

H -0.090063894783 6.046261241240 -1.332542081391

MA<sup>+</sup>, electronic energy = -594.653287459

H 0.996818959929 -1.398076474751 2.644276252843  
C 0.762986144146 -1.931646383026 1.721581453845  
C -0.485595078881 -1.653526634315 1.087060114928  
C 1.622993542046 -2.847468143523 1.184409391734  
C -0.830861766406 -2.317861868717 -0.132554582152  
C -1.389139049553 -0.747857771364 1.642009936595  
C 1.258670703455 -3.528493967788 -0.007453241444  
H 2.575648576941 -3.068391779679 1.665877739596  
C 0.073891036770 -3.280453273259 -0.657712535719  
N -2.016909864971 -2.023283015237 -0.749747572466  
C -2.631233032167 -0.525180803541 1.048531344299  
H 1.934577243857 -4.279324836707 -0.419961856058  
H -0.165472628106 -3.847861397399 -1.552885535204  
C -2.948605924690 -1.204180624382 -0.170583735357  
C -2.301062982826 -2.608620791764 -2.067920858039  
C -3.585274957456 0.355010681799 1.643500263365  
C -4.239103874614 -1.012328189272 -0.735168280212  
H -2.922079884669 -1.918611753817 -2.642272668304  
H -1.364849352600 -2.737585868411 -2.614295499583  
H -2.811058089024 -3.574445060157 -1.953753942576  
C -4.811573462462 0.536336997872 1.068860737937  
H -3.304155563920 0.863709157666 2.567046770402  
C -5.132680724379 -0.167406178444 -0.122230229690  
H -4.545736181908 -1.544352373964 -1.631554649480  
H -5.546606504768 1.202931794801 1.520024207782  
H -6.122319741103 -0.042355449905 -0.564651892347  
H -1.129682542642 -0.222971992717 2.564758865306

In chloroform

DMPBIH, electronic energy = -689.943583119

C 4.357889560886 -1.081579331224 -1.183508512932  
C 4.817165900441 -0.634498162446 0.045630941930  
C 3.006678718102 -0.909615196457 -1.561744807978  
H 5.047001945424 -1.562769352959 -1.879556824677  
C 3.948081816961 0.006790785032 0.957687037889  
H 5.866786509901 -0.764752600548 0.314393566260  
C 2.151476551776 -0.301532927647 -0.660323359780  
H 2.651735513358 -1.240477627286 -2.538717716235  
C 2.621050263343 0.155572354525 0.596374132903  
H 4.315789178402 0.379390583608 1.914709177661  
N 0.799513618959 -0.010094904131 -0.739645665923  
N 1.550220928103 0.720679539781 1.269433562231  
C 0.442712474819 0.914119552750 0.335203704533  
C 0.084845005834 0.004842714778 -1.988000566910  
C 1.722723164440 1.599228542546 2.395381298613  
H -0.514110549691 0.614805974208 0.801598593305  
C 0.294112058272 2.359636148627 -0.135056866930  
H -0.988273597576 0.138951067939 -1.793881912630  
H 0.419456023041 0.811736595687 -2.666940660719  
H 0.215271706851 -0.959126766113 -2.500521149011  
H 2.210340759857 2.555066415200 2.125928126032  
H 0.742482681522 1.823748389849 2.838066369268  
H 2.331654935635 1.101057164786 3.163465331057  
C -0.903662120182 3.046287588342 0.062730831909  
C 1.361072193642 3.010171208774 -0.770348796385  
C -1.043727283783 4.368885929866 -0.366010727410  
H -1.736498182253 2.539850037718 0.558129290751  
C 1.223690508625 4.328233045361 -1.198443047655  
H 2.304333286697 2.480457869215 -0.930121507679



|   |                 |                |                 |
|---|-----------------|----------------|-----------------|
| C | 0.019884999453  | 5.010246909284 | -0.996715031011 |
| H | -1.985446490805 | 4.897103368447 | -0.206269557308 |
| H | 2.058402614044  | 4.828737874529 | -1.692384307205 |
| H | -0.085268694097 | 6.043247207957 | -1.333163945965 |

MA<sup>+</sup>, electronic energy = -594.641935943

|   |                 |                 |                 |
|---|-----------------|-----------------|-----------------|
| H | 1.000915106425  | -1.398975844015 | 2.643140775389  |
| C | 0.764016545085  | -1.931800985581 | 1.720803659664  |
| C | -0.484208001863 | -1.652758722409 | 1.086504052715  |
| C | 1.623172145363  | -2.848907286461 | 1.184833702130  |
| C | -0.830280137479 | -2.319041901844 | -0.132101966698 |
| C | -1.387987066410 | -0.745768996800 | 1.639035665797  |
| C | 1.258102251382  | -3.530955644232 | -0.005560122309 |
| H | 2.575365443115  | -3.069840899225 | 1.666822695548  |
| C | 0.073130025013  | -3.282474003148 | -0.655772438838 |
| N | -2.016915685774 | -2.023286241081 | -0.749473523435 |
| C | -2.631372287076 | -0.523620372325 | 1.047954763318  |
| H | 1.933169301531  | -4.283115471125 | -0.416825461325 |
| H | -0.166213195443 | -3.851799350042 | -1.549636957413 |
| C | -2.949915844777 | -1.204368517273 | -0.170163538001 |
| C | -2.299119973101 | -2.604958566986 | -2.069275781700 |
| C | -3.585972087690 | 0.355745838922  | 1.642701184873  |
| C | -4.240385498297 | -1.014067884395 | -0.733244642127 |
| H | -2.919092472202 | -1.913531819897 | -2.643550163679 |
| H | -1.362333394326 | -2.732326758264 | -2.615565753157 |
| H | -2.809503150980 | -3.571660035963 | -1.961651335229 |
| C | -4.812875721670 | 0.535662680706  | 1.069263624527  |
| H | -3.307194273419 | 0.866534925665  | 2.565797537837  |
| C | -5.134435400613 | -0.169243850342 | -0.120364156286 |
| H | -4.548636207130 | -1.547131946164 | -1.628361437712 |
| H | -5.547675768758 | 1.201873656981  | 1.520959181288  |
| H | -6.124725480923 | -0.045611809243 | -0.561544205059 |
| H | -1.127444169982 | -0.218866195459 | 2.560464639880  |

### The atom coordinates and electronic energies of the classical TS structures in gas-phase

TS1: electronic energy = -1284.503328128089 Hartree

|   |                 |                 |                 |
|---|-----------------|-----------------|-----------------|
| C | 4.990255273445  | -0.968491279318 | 0.164411560275  |
| C | 5.075571916526  | -0.214577567587 | 1.339078729962  |
| C | 3.858382430721  | -0.908645411691 | -0.656630020830 |
| H | 5.821135353197  | -1.614975745369 | -0.118521540821 |
| C | 4.040925961234  | 0.640136366296  | 1.735617374879  |
| H | 5.969290948406  | -0.288543164806 | 1.958892569447  |
| C | 2.826357606562  | -0.068250108709 | -0.257332858205 |
| H | 3.788570679852  | -1.496990484902 | -1.571967645631 |
| C | 2.921001087904  | 0.712291652518  | 0.913821701435  |
| H | 4.116867626803  | 1.229034614901  | 2.649690710661  |
| N | 1.588029131723  | 0.177583983817  | -0.817824695920 |
| N | 1.769937840089  | 1.472423962170  | 0.994305977624  |
| C | 0.839067340186  | 1.044764664912  | 0.012048885870  |
| C | 1.157806812281  | -0.310151309653 | -2.106329933598 |
| C | 1.412354464255  | 2.337263433647  | 2.088270919963  |
| H | -0.015788643011 | 0.358519424699  | 0.580636845152  |
| C | 0.055348555105  | 2.134127331902  | -0.687318287765 |
| H | 0.091692983965  | -0.084393404010 | -2.237382833640 |
| H | 1.720725783177  | 0.171060497802  | -2.922326295804 |
| H | 1.303412720572  | -1.400390302038 | -2.163665379256 |
| H | 0.649380271905  | 3.050887310955  | 1.750475882423  |
| H | 1.021799305411  | 1.775370870739  | 2.955156047650  |
| H | 2.295358747765  | 2.904860521571  | 2.410063659884  |

|   |                 |                 |                 |
|---|-----------------|-----------------|-----------------|
| C | -1.323991480278 | 2.273090134728  | -0.531133380935 |
| C | 0.761191087411  | 3.025957582154  | -1.504061430140 |
| C | -1.999268091949 | 3.300381632801  | -1.194097361904 |
| H | -1.875394713724 | 1.589160845976  | 0.115358882013  |
| C | 0.085017181699  | 4.046694828908  | -2.164472919552 |
| H | 1.842827417898  | 2.914691570460  | -1.614278395643 |
| C | -1.297235121714 | 4.183422725878  | -2.010483621877 |
| H | -3.076881241580 | 3.410166313443  | -1.066648243321 |
| H | 0.635273952722  | 4.741307808618  | -2.800341101236 |
| H | -1.825433468887 | 4.985350435734  | -2.527772277090 |
| H | 1.669704072506  | -2.205797314998 | 1.303923090822  |
| C | 0.969964852632  | -2.547243590609 | 0.537265512887  |
| C | -0.303689674929 | -1.942458643145 | 0.468977187529  |
| C | 1.335223197738  | -3.534862652187 | -0.351018349938 |
| C | -1.225266111161 | -2.343288232585 | -0.537245160731 |
| C | -0.678906677361 | -0.890391480924 | 1.359854983894  |
| C | 0.409902946528  | -3.946835364239 | -1.329827156575 |
| H | 2.319519619124  | -3.998616280160 | -0.289887980309 |
| C | -0.845144072576 | -3.372218772394 | -1.427540511323 |
| N | -2.462214269586 | -1.730957398046 | -0.612719208276 |
| C | -2.062798302973 | -0.540107183913 | 1.461911999799  |
| H | 0.676072033808  | -4.748116546549 | -2.020935961852 |
| H | -1.538309323987 | -3.747807921344 | -2.176311137593 |
| C | -2.945031485330 | -0.954875348654 | 0.430297175262  |
| C | -3.323038407905 | -1.993977965604 | -1.760628004292 |
| C | -2.545742410121 | 0.260931203426  | 2.519732440134  |
| C | -4.299030112683 | -0.561354770694 | 0.500849164082  |
| H | -3.941617698130 | -1.113076478859 | -1.956773040098 |
| H | -2.703955727276 | -2.161081465156 | -2.646779008322 |
| H | -3.970870413133 | -2.868380309544 | -1.595772280185 |
| C | -3.867914325151 | 0.646832759906  | 2.568542613415  |
| H | -1.846685400213 | 0.570567761771  | 3.299197111954  |
| C | -4.741492083997 | 0.225750799852  | 1.549510121622  |
| H | -5.016459843059 | -0.892345520684 | -0.246161155791 |
| H | -4.237354916489 | 1.261324082109  | 3.389042125496  |
| H | -5.793987980301 | 0.509369827325  | 1.588510497770  |
| H | -0.028095162509 | -0.688003439956 | 2.215814120963  |

TS2: electronic energy = -1284.506184781171 Hartree

|   |                 |                 |                 |
|---|-----------------|-----------------|-----------------|
| C | 4.535392394089  | -0.719611014705 | -1.019172342745 |
| C | 4.909387301446  | -0.176244388647 | 0.211874889717  |
| C | 3.226767198636  | -0.597332317290 | -1.501982816772 |
| H | 5.276199998766  | -1.246961403027 | -1.620355239161 |
| C | 3.993365339387  | 0.522345174162  | 1.008609002559  |
| H | 5.937618687035  | -0.287221179596 | 0.556889896206  |
| C | 2.317148503055  | 0.100568173183  | -0.715900445285 |
| H | 2.943232774956  | -1.022606242445 | -2.464845952512 |
| C | 2.701973609373  | 0.661781693250  | 0.517931458939  |
| H | 4.289078009216  | 0.954982046655  | 1.964628337086  |
| N | 0.974738375019  | 0.395389748809  | -0.893301653940 |
| N | 1.594249329346  | 1.297322928088  | 1.044092001303  |
| C | 0.486230160556  | 1.166794760166  | 0.181479317575  |
| C | 0.223252725174  | 0.210307619228  | -2.110507586573 |
| C | 1.593745044633  | 2.084978728629  | 2.253765641425  |
| H | -0.399272574935 | 0.472813393143  | 0.760670726295  |
| C | -0.258870780526 | 2.436105274668  | -0.178324291619 |
| H | -0.820830279587 | -0.035465690204 | -1.865532406337 |
| H | 0.234231826664  | 1.116308820251  | -2.736809445558 |
| H | 0.657072920987  | -0.627248938019 | -2.671017420018 |
| H | 2.298658426958  | 2.927092261540  | 2.175186837112  |
| H | 0.587945242787  | 2.491199908852  | 2.417260877387  |

|   |                 |                 |                 |
|---|-----------------|-----------------|-----------------|
| H | 1.878234934805  | 1.468480231981  | 3.120473939256  |
| C | -1.648619625767 | 2.524377896344  | -0.105449005828 |
| C | 0.491402688908  | 3.526370485137  | -0.636089213713 |
| C | -2.290862678281 | 3.703487292793  | -0.488241478458 |
| H | -2.234553921076 | 1.674117775558  | 0.247767169460  |
| C | -0.152236300273 | 4.700729722373  | -1.014428729454 |
| H | 1.580471089448  | 3.448798514549  | -0.692661532918 |
| C | -1.544610210551 | 4.789273219279  | -0.940233528594 |
| H | -3.377634673577 | 3.772027272076  | -0.429641594023 |
| H | 0.431704038381  | 5.551367585726  | -1.367965577135 |
| H | -2.047343238087 | 5.710995636982  | -1.235700607280 |
| H | 1.349412931125  | -1.295233477172 | 2.618247059136  |
| C | 1.170520014253  | -1.846054488686 | 1.692385158010  |
| C | -0.077023965784 | -1.692322080087 | 1.051500080049  |
| C | 2.151547348182  | -2.645067739190 | 1.151059432447  |
| C | -0.351740553000 | -2.399220030406 | -0.152151010666 |
| C | -1.028982610846 | -0.727658117264 | 1.502826727418  |
| C | 1.883578481589  | -3.329805663634 | -0.049183105204 |
| H | 3.121186703913  | -2.747203576040 | 1.637871682112  |
| C | 0.657962229745  | -3.232076301275 | -0.683956477877 |
| N | -1.584122988990 | -2.256322742116 | -0.763101321882 |
| C | -2.387190059711 | -0.852166608683 | 1.043854845246  |
| H | 2.649739267961  | -3.975212883641 | -0.481562261940 |
| H | 0.482194802804  | -3.825969818685 | -1.577601858872 |
| C | -2.642974896248 | -1.631704529212 | -0.111297599869 |
| C | -1.817529191257 | -2.877784529389 | -2.060847163104 |
| C | -3.453915986246 | -0.206708220415 | 1.703263438012  |
| C | -3.973248419090 | -1.756637505420 | -0.563286018792 |
| H | -2.575731088910 | -2.307074408366 | -2.605641475932 |
| H | -0.897614067182 | -2.845939385824 | -2.652561909776 |
| H | -2.148463631500 | -3.923150260233 | -1.962101034364 |
| C | -4.748871237917 | -0.324927448647 | 1.241422330556  |
| H | -3.233848616290 | 0.387046105926  | 2.592959590667  |
| C | -4.999737070669 | -1.109324358445 | 0.103381294570  |
| H | -4.216186388783 | -2.384205023995 | -1.417596303179 |
| H | -5.569711937003 | 0.169669535929  | 1.760084253543  |
| H | -6.021855602231 | -1.228589613911 | -0.257971853443 |
| H | -0.863145390020 | -0.262394850434 | 2.479886110716  |

TS3: electronic energy = -1284.483220789452 Hartree

|   |                 |                 |                 |
|---|-----------------|-----------------|-----------------|
| C | -5.181262098435 | -0.799029871121 | -0.946402655378 |
| C | -5.279082861847 | 0.589563317638  | -0.823394213057 |
| C | -4.060522625203 | -1.488543979548 | -0.473965043166 |
| H | -5.990813199529 | -1.355747646408 | -1.418782054406 |
| C | -4.258107519817 | 1.336098522464  | -0.227918576331 |
| H | -6.164630456222 | 1.101606240293  | -1.200398522778 |
| C | -3.040730125523 | -0.746885884523 | 0.113505680811  |
| H | -3.993158636986 | -2.574221531563 | -0.557589938304 |
| C | -3.136044005090 | 0.653906679470  | 0.230583310679  |
| H | -4.339703146624 | 2.418770531411  | -0.124125864278 |
| N | -1.850425786792 | -1.170985605548 | 0.715587708191  |
| N | -2.006106331910 | 1.128715354288  | 0.901979841073  |
| C | -1.075036552078 | 0.030926856240  | 0.875132102839  |
| C | -1.831487620022 | -2.368157822678 | 1.542288119212  |
| C | -2.134629438952 | 2.139949255101  | 1.942605107689  |
| H | -0.596153017290 | 0.147272834465  | -0.200061906821 |
| C | 0.192092815578  | 0.074174663844  | 1.668000081626  |
| H | -2.853981880330 | -2.764926299309 | 1.585976313860  |
| H | -1.175250361319 | -3.152578853031 | 1.132945713557  |
| H | -1.518865797049 | -2.135972370358 | 2.569566616349  |
| H | -3.203567517290 | 2.299057257300  | 2.139192318163  |

|   |                 |                 |                 |
|---|-----------------|-----------------|-----------------|
| H | -1.665011235017 | 1.800243011538  | 2.875509262920  |
| H | -1.690324649731 | 3.104018038979  | 1.652716553138  |
| C | 0.803001049966  | 1.318204874649  | 1.908286802570  |
| C | 0.921849983586  | -1.090900214972 | 1.953219228614  |
| C | 2.063946560793  | 1.392533477965  | 2.493606830209  |
| H | 0.304445159069  | 2.241580494703  | 1.615644512044  |
| C | 2.183372566319  | -1.012081292792 | 2.541044714631  |
| H | 0.528945044241  | -2.073036940519 | 1.699763642859  |
| C | 2.753174167130  | 0.226855789485  | 2.827577139402  |
| H | 2.509260621553  | 2.369723595266  | 2.685699864835  |
| H | 2.721969100098  | -1.932081160598 | 2.774360313572  |
| H | 3.735144298045  | 0.284811134092  | 3.300074175952  |
| H | -1.063843045637 | -2.281216912026 | -1.920144957682 |
| C | -0.016205613378 | -2.363595059650 | -1.623240604235 |
| C | 0.725539785475  | -1.168612480669 | -1.457066358402 |
| C | 0.572453058661  | -3.590867772608 | -1.418164928978 |
| C | 2.089261708183  | -1.220211041739 | -1.049461191863 |
| C | 0.099995592119  | 0.097531580599  | -1.605268707712 |
| C | 1.934948233611  | -3.640832835668 | -1.062272486644 |
| H | 0.005894523795  | -4.511935403730 | -1.552721627403 |
| C | 2.685366805101  | -2.493423558059 | -0.888739264822 |
| N | 2.789137526760  | -0.050222838524 | -0.832069643010 |
| C | 0.875496274357  | 1.285002126205  | -1.505294118578 |
| H | 2.421216795785  | -4.608943596968 | -0.933000535416 |
| H | 3.739898157418  | -2.593559877442 | -0.647229826173 |
| C | 2.236871005360  | 1.187580668352  | -1.103957040194 |
| C | 4.157958110060  | -0.126282822703 | -0.325239157164 |
| C | 0.287435469966  | 2.552601724889  | -1.733428838161 |
| C | 2.988393023791  | 2.382879810432  | -1.012469305397 |
| H | 4.373545601075  | 0.760589296240  | 0.275016084512  |
| H | 4.249013708042  | -0.985415393323 | 0.344023912255  |
| H | 4.885408229877  | -0.210956501869 | -1.146552438641 |
| C | 1.026218338797  | 3.705120361477  | -1.599021457235 |
| H | -0.765421118945 | 2.588446195881  | -2.020546602475 |
| C | 2.387599651615  | 3.604114923217  | -1.249734427973 |
| H | 4.048938494049  | 2.363044307323  | -0.777261863240 |
| H | 0.576287868896  | 4.680980567321  | -1.779244696512 |
| H | 2.992148636177  | 4.509166741093  | -1.175008106771 |
| H | -0.889658324330 | 0.147854335726  | -2.069659992364 |

TS8: electronic energy = -1284.516864552883 Hartree

|   |                 |                 |                 |
|---|-----------------|-----------------|-----------------|
| C | -1.858594189750 | 0.703497704771  | -3.555699857344 |
| C | -1.858481960324 | -0.697479438688 | -3.556944432549 |
| C | -1.051295648215 | 1.430841460411  | -2.675055161933 |
| H | -2.490892445483 | 1.238781806840  | -4.264691681208 |
| C | -1.051066530601 | -1.426257504972 | -2.677593932382 |
| H | -2.490694673229 | -1.231604331903 | -4.266886162011 |
| C | -0.241338486428 | 0.706324210621  | -1.804897901631 |
| H | -1.040854574623 | 2.521208014293  | -2.683186931718 |
| C | -0.241224681048 | -0.703157606444 | -1.806150369907 |
| H | -1.040450554232 | -2.516606317320 | -2.687662951656 |
| N | 0.677749495654  | 1.118677345290  | -0.866128239292 |
| N | 0.677933737091  | -1.117030321198 | -0.868118978931 |
| C | 1.260248140196  | 0.000299652615  | -0.224546262529 |
| C | 1.111239427590  | 2.487453588452  | -0.695285830923 |
| C | 1.111630230381  | -2.486041095160 | -0.699698339335 |
| H | 0.852521874963  | -0.000788957793 | 0.960227010915  |
| C | 2.766861487023  | 0.000301106732  | -0.084168438387 |
| H | 1.811202696799  | 2.539841327934  | 0.147163110832  |
| H | 1.620345112894  | 2.853125226130  | -1.601019175777 |
| H | 0.248012452691  | 3.133891345255  | -0.474884629829 |

|   |                 |                 |                 |
|---|-----------------|-----------------|-----------------|
| H | 1.811657083326  | -2.539800214153 | 0.142611418269  |
| H | 0.248512319510  | -3.132991312654 | -0.480373295050 |
| H | 1.620730659010  | -2.850051515835 | -1.606103305824 |
| C | 3.397086694106  | -0.000786119678 | 1.158777972234  |
| C | 3.532237619390  | 0.001441946861  | -1.256790324842 |
| C | 4.791198278222  | -0.000737919728 | 1.235597722199  |
| H | 2.800953130191  | -0.001676236732 | 2.073296891106  |
| C | 4.921206305530  | 0.001489671457  | -1.178825533264 |
| H | 3.031855657791  | 0.002290554249  | -2.228958414354 |
| C | 5.551136194438  | 0.000398892377  | 0.068545525952  |
| H | 5.282573434578  | -0.001589386139 | 2.209070286751  |
| H | 5.517651898500  | 0.002378698713  | -2.091938246458 |
| H | 6.640162633985  | 0.000438102494  | 0.128012306519  |
| H | 0.482583163191  | -2.444008205065 | 3.061145547416  |
| C | -0.369969472386 | -2.457651618642 | 2.378651628183  |
| C | -0.821007901103 | -1.230708801655 | 1.843671332057  |
| C | -0.990026838029 | -3.644189570031 | 2.055182951773  |
| C | -1.930131823516 | -1.206929523463 | 0.958391452747  |
| C | -0.142576362223 | -0.001900355345 | 2.130174078786  |
| C | -2.086917138862 | -3.619614596785 | 1.173082459594  |
| H | -0.645461381770 | -4.587078295833 | 2.479173336323  |
| C | -2.553663687838 | -2.433876539177 | 0.634802709053  |
| N | -2.378235040721 | -0.000618431849 | 0.443613835485  |
| C | -0.821227334614 | 1.227287916867  | 1.845830194155  |
| H | -2.597152756149 | -4.549884767758 | 0.919196285839  |
| H | -3.426721782910 | -2.463080946170 | -0.011814822076 |
| C | -1.930347193623 | 1.204865713060  | 0.960510056184  |
| C | -3.472068685272 | 0.000134269095  | -0.522148376959 |
| C | -0.370408995867 | 2.453369857955  | 2.382965857122  |
| C | -2.554097813843 | 2.432267692015  | 0.639075457458  |
| H | -3.385049140975 | 0.874476278898  | -1.172235882549 |
| H | -3.384913869540 | -0.873064505716 | -1.173751456740 |
| H | -4.451855256288 | -0.000377963174 | -0.019667099570 |
| C | -0.990677734508 | 3.640363277803  | 2.061580620985  |
| H | 0.482145345912  | 2.438679658675  | 3.065435916928  |
| C | -2.087562555059 | 3.617141811393  | 1.179436496581  |
| H | -3.427159708726 | 2.462451513592  | -0.007491979828 |
| H | -0.646280947749 | 4.582567436599  | 2.487226715414  |
| H | -2.597963523273 | 4.547765512772  | 0.927183284841  |
| H | 0.602854615812  | -0.002535195162 | 2.929722553153  |
